1  
2  
3  
4  
5

# 6 **easyCLIP Quantifies RNA-Protein Interactions** 7 **and Characterizes Recurrent PCBP1 Mutations in** 8 **Cancer**

9

10 **Authors:** Douglas F. Porter<sup>1</sup>, Paul A. Khavari<sup>1\*</sup>

11  
12  
13

14

15

16

17

18

19

20

21

22

23

24

25

26

27

28

29

## 30 **Affiliations:**

31 <sup>1</sup>Program in Epithelial Biology, Stanford University, Stanford, CA 94305 and the  
32 Stanford Program in Cancer Biology, Stanford University, Stanford, CA 94305

33 \*Correspondence to: [khavari@stanford.edu](mailto:khavari@stanford.edu)

34

35 **ABSTRACT**

36 **RNA-protein interactions mediate a host of cellular processes, underscoring the need**  
37 **for methods to quantify their occurrence in living cells. RNA interaction frequencies**  
38 **for the average cellular protein are undefined, however, and there is no quantitative**  
39 **threshold to define a protein as an RNA-binding protein (RBP). Ultraviolet (UV) cross-**  
40 **linking immunoprecipitation (CLIP)-sequencing, an effective and widely used**  
41 **means of characterizing RNA-protein interactions, would particularly benefit from**  
42 **the capacity to quantitate the number of RNA cross-links per protein per cell. In**  
43 **addition, CLIP-seq methods are difficult, have high experimental failure rates and**  
44 **many ambiguous analytical decisions. To address these issues, the easyCLIP**  
45 **method was developed and used to quantify RNA-protein interactions for a panel**  
46 **of known RBPs as well as a spectrum of random non-RBP proteins. easyCLIP**  
47 **provides the advantages of good efficiency compared to current standards, a**  
48 **simple protocol with a very low failure rate, troubleshooting information that**  
49 **includes direct visualization of prepared libraries without amplification, and a new**  
50 **form of analysis. easyCLIP, which uses sequential on-bead ligation of 5' and 3'**  
51 **adapters tagged with different infrared dyes, classified non-RBPs as those with a**  
52 **per protein RNA cross-link rate of <0.1%, with most RBPs substantially above this**  
53 **threshold, including Rbfox1 (18%), hnRNPC (22%), CELF1 (11%), FBL (2%), and**  
54 **STAU1 (1%). easyCLIP with the PCBP1<sup>L100</sup> RBP mutant recurrently seen in cancer**  
55 **quantified increased RNA binding compared to wild-type PCBP1 and suggested a**  
56 **potential mechanism for this RBP mutant in cancer. easyCLIP provides a simple,**  
57 **efficient and robust method to both obtain both traditional CLIP-seq information**  
58 **and to define actual RNA interaction frequencies for a given protein, enabling**  
59 **quantitative cross-RBP comparisons as well as insight into RBP mechanisms.**

60  
61  
62

63 **Introduction**

64 The number of RNA-protein interaction datasets is growing rapidly, raising the importance of  
65 being able to integrate them into models of the global RNA-protein interactome and the  
66 challenges of integrating such data between RNA-binding proteins (RBPs) was recently  
67 highlighted<sup>1</sup>. The physical reality of RNA-protein interactions is their individual occurrence in  
68 individual cells, which may be abstracted to an average complex number per-cell in a  
69 population. The RNA-protein complex count per-cell may be normalized to derive the number  
70 of complexes per-interaction partner. It is these frequencies, per-cell and per-interaction  
71 partner, that are the most basic characterizations of RNA-protein interaction networks.  
72 Determining the targets of an RBP by enrichment over negative control immunopurifications,  
73 or by clustering of cross-links, or many such other approaches, are all ultimately inferring that  
74 the absolute count of an RNA-protein complex in the cell is abnormally high. The estimation  
75 of per-cell and per-protein absolute quantities provide the ultimate framework for describing  
76 a global and widely reproducible view of RNA-protein interactions.

77  
78 There is currently no general method to estimate absolute RNA-protein interaction  
79 frequencies, either by cross-linking or by other means. Relative interaction frequencies have  
80 been estimated by comparing co-purified radiolabeled RNA, but this method does not yield  
81 absolute numbers. It is possible to estimate cross-link rates by observing the amount of UV-  
82 and RNase-dependent decrease in an immunoblot band for proteins that cross-link well,  
83 but this is not feasible for proteins with a cross-link rate of ~1%. Western blot quantification  
84 is further complicated by the fact that absolute quantification requires protein in single bands  
85 of at least 5 ng, the narrow region of linear signal in immunoblots, and the fact that protein  
86 cross-linked to an over-digested 1-3 base fragment of RNA (~0.3-1 kDa) will run so close to  
87 un-cross-linked protein that it would not be distinct for a ~70 kDa protein<sup>2</sup>.

88  
89 One of the common questions in molecular biology is whether there are specific RNA  
90 interactions for a protein of interest, and what those RNAs are. However, there is no  
91 agreement on what constitutes a target RNA, and interactions occur along a continuum of  
92 affinities<sup>3</sup>. One potential criterion for a specific RNA interaction for a protein of interest is those  
93 interactions with a frequency per protein or fraction of interactions unlikely to occur with a  
94 randomly selected protein. Neither of these definitions have been used because no library of  
95 random non-RBP RNA-interactomes have been analyzed. One of the goals of this study was  
96 to enable target RNAs to be defined in these two ways.

97  
98 Here we report an improvement to current CLIP protocols in an approach termed  
99 easyCLIP. easyCLIP reliably quantifies the numbers of RNA cross-links-per-protein and  
100 provides visual confirmation of each step in the CLIP protocol. easyCLIP was used to  
101 produce data for eleven randomly selected non-RBPs as well as a set of canonical RBPs,  
102 allowing us to approximate the distribution of RNA-binding interactions with the average  
103 protein and to propose a threshold for assignment of a protein as an RBP.

104  
105 Finally, easyCLIP was applied to quantify the mutational impacts on RNA binding of L100  
106 PCBP1. L100 PCBP1 missense mutants were highlighted in a recent global analysis of  
107 mutations in gastrointestinal adenocarcinoma (GIAC)<sup>4</sup>, which characterized a subset of GIAC  
108 that were broadly “genome stable” (i.e., lacking chromosome or microsatellite instability), but

109 possessing frequent mutations in APC, KRAS, SOX9, and PCBP1. Unexpectedly,  
110 easyCLIP found the common cancer-associated L100 mutations in *PCBP1* increased the  
111 association of PCBP1 with RNA and suggested potential mechanisms for their selective  
112 advantage. easyCLIP is thus presented as a new CLIP method with built in verification  
113 checks that enables quantification of the number of RNA cross-links per protein to allow  
114 quantitative comparison across CLIP datasets.  
115  
116

117 **Results**

118 **Library preparation by easyCLIP.** To generate a simpler and faster way of producing CLIP-  
119 seq datasets, a method was developed using on-bead ligations<sup>5-7</sup> of 3' adapters (termed  
120 L3) and 5' adapters (termed L5), each with a different fluorescent dye<sup>8</sup> (Figure 1A, B). After  
121 running an SDS-PAGE gel and transferring to a nitrocellulose membrane, single- and dual-  
122 ligated RNA were clearly visible (Figure 1C). RNA was extracted from the nitrocellulose  
123 membrane using proteinase K, purified using oligonucleotide(dT) beads to capture the  
124 poly(A) sequence on the L3 adapter, eluted, reverse transcribed, and input directly into PCR  
125 (Figure 1A). Major differences from HITS-CLIP include the usage of a chimeric DNA-RNA  
126 hybrid for highly efficient ligation (see below), the purification of complexes from a gel by  
127 oligo(dT), L5 and L3 barcodes, UMIs, and the direct visualization of ligation efficiencies and  
128 finished libraries by infrared dyes (see below).

129  
130 This method (“easyCLIP”) incorporated several advantages. First, since all that happens after  
131 the gel extraction is a quick oligonucleotide(dT) purification and reverse transcription before  
132 PCR, there are minimal opportunities for error after the diagnostic step of gel imaging.  
133 Second, L5 and L3 barcodes may be used to mark samples and replicates, respectively, and  
134 all samples may be combined before running SDS-PAGE. This combination of samples  
135 allows for lower complexity preparations to “piggy-back” on higher complexity preparations,  
136 which allows very small RNA quantities that may be lost to sample absorption to be converted  
137 into libraries and for diagnostics from the larger libraries to be used for the smaller.

138  
139 easyCLIP was benchmarked against eCLIP in the manner eCLIP was benchmarked against  
140 iCLIP, namely using Rbfox2, 10 µg antibody, and 20 million 293T cells. easyCLIP was more  
141 efficient than the published eCLIP results (Figure S1A), and easyCLIP RBFOX2 libraries fit  
142 expectations, including matching the pattern of binding seen with eCLIP at NDEL1 (Figure  
143 S1B), indicating that easyCLIP captures similar information. easyCLIP was then used to  
144 generate data for seven additional known RBPs: FBL (Fibrillarlin, which associates with C/D-  
145 box snoRNA and other ncRNA), hnRNP C, hnRNP D, Rbfox1, CELF1, SF3B1 and PCBP1  
146 (all of which at least partly bind mRNA). These were chosen as representatives (FBL, hnRNP  
147 C), for their importance to cancer (SF3B1, PCBP1), for comparison with eCLIP (Rbfox2), or  
148 by using a random number generator to select RBPs at random from the RBP atlas<sup>9</sup> (Rbfox1,  
149 CELF1, hnRNP D). No randomly selected or representative RBPs were discarded.

150  
151 easyCLIP libraries produced high quality data in each case (Figure 1D-J, Files 2-5). First, the  
152 data was consistent between replicates but distinct between proteins (Figure 1D). Second,  
153 FBL and hnRNP C/hnRNP D were un-correlated (Figure 1D), as expected. The data was  
154 high quality enough for all eight RBPs that simply feeding the sequences under the tallest  
155 1,000 peaks (10,000 for CELF1) to a *de novo* motif discovery program<sup>10</sup> resulted in the top  
156 motif being the expected motifs for all eight proteins, despite not performing any statistical  
157 tests, normalization, or comparison to a control (Figure 1E). This indicates easyCLIP data is  
158 clean enough that no statistical methods or controls are necessary to obtain good quality  
159 peaks. Using enrichment over controls also recovered all eight motifs (Figure 1F).

160  
161 The motif obtained for FBL is expected because it is similar to the boxes of C/D box  
162 snoRNAs. As expected, hnRNP C, hnRNP D, CELF1, Rbfox1, and Rbfox2 bound mostly

163 mRNA, while FBL was mostly crosslinked to snoRNA and snRNA (Figure 1G). PCBP1 and  
164 SF3B1 bound to both mRNA and snRNA, as expected. The main surprise was the  
165 appearance of tRNA-binding by PCBP1, addressed further below. About ~90% of hnRNP  
166 C/hnRNP D mRNA reads were intronic, as expected (Figure 1H). Under a highly stringent  
167 FDR<10<sup>-4</sup> vs random non-RBPs (discussed below), target RNA numbers (Figure 1I) and the  
168 total number of unique mapped reads were both similar to what is typical for CLIP studies  
169 (Figure S1C); inputs ranged from a fraction of a 10 cm plate (Rbfox2, hnRNP C), to one 15  
170 cm plate (PCBP1).

171  
172 It is sometimes argued that iCLIP methods and their derivatives have higher resolution  
173 because the stop point of reverse transcriptase is mapped, but it has been shown that  
174 deletions in CLIP-seq reads also map binding sites to the same resolution<sup>11</sup>. For a very short  
175 RNA, such as a snoRNA, binding sites over much of the RNA are too close the 3' end to be  
176 mappable, making the binding site ambiguous. However, using deletions allows binding sites  
177 anywhere in the RNA to be identified. Cross-linking positions within C/D box snoRNA were  
178 visualized in some detail (Figure 1J), and the respective frequencies of crosslinking in the  
179 different regions of C/D box snoRNAs matched previous reports<sup>12</sup>. This indicates easyCLIP  
180 provides an advantage over iCLIP/eCLIP-like methods for short RNAs, where reads with  
181 reverse transcriptase stops near the 3' end are not mappable.

182  
183 **Estimating absolute RNA quantities.** easyCLIP was next tested to see if it could determine  
184 the total amount of RNA crosslinked to a given protein. Prior work has ligated 3' adapter  
185 molecules labelled with infrared dyes to count crosslinked RNAs<sup>8</sup>, but this method does not  
186 account for un-ligated RNA, and is only accurate if there are no changes in dye fluorescence  
187 during the procedure or from imaging conditions.

188  
189 When HEK293T cells were UV-crosslinked, hnRNP C immunopurified and RNA highly  
190 digested, a series of bands were visible by western blot (Figure 2A), spaced at roughly the  
191 ~60 kDa size of an hnRNP C dimer, as not all cross-linked complexes can be collapsed to  
192 monomers by RNase digestion. If a ~15 kDa fluorescent adapter was ligated to highly  
193 digested hnRNP C-crosslinked RNA, a new band ~15 kDa above monomeric hnRNP C  
194 appeared containing adapter and hnRNP C (Figure 2B). The amount of protein in this band  
195 was determined by quantitative western blotting (Figure 2C, Figure S2A). The concentrations  
196 of standards were determined using multiple methods (Figure S2B-E), and consistency was  
197 established between epitope standards (Figure S2F). To determine if the hnRNP C antibody  
198 used (4F4) discriminated between non-cross-linked and cross-linked hnRNP C, epitope  
199 tagged hnRNP C was *in vitro* crosslinked to RNA, and 4F4 antibody showed only a negligible  
200 16% bias (Figure S2G). Because the cross-linked band (Figure 2B) contains an equal  
201 number of protein and RNA molecules, quantification of the amount of protein in the cross-  
202 linked band relates adapter fluorescence values in this band into an absolute molecule  
203 number. Quantification of fluorescence per molecule using a single, large preparation of  
204 cross-linked, quantified hnRNP C as an aliquoted standard can be used to translate  
205 fluorescence values to RNA quantities if the loss is fluorescence is low and the ligation  
206 efficiency can be approximated.

207

208 **Fluorescence loss.** To address the loss in adapter fluorescence from CLIP, a method was  
209 developed to determine this value for labelled DNA oligonucleotides. Antisense  
210 oligonucleotides to L5 and L3 were labelled with reciprocal dyes, hereafter termed  $\alpha$ L5 and  
211  $\alpha$ L3, and used to shift their cognate adapter. That is, a red  $\alpha$ L3 and a green  $\alpha$ L5 are used to  
212 shift a green L3 and red L5. Such antisense oligonucleotides shift the adapter molecules up  
213 in a native gel and produce bands of both colors with a 1:1 ratio of antisense and sense  
214 oligonucleotide (Figure 2D). L5 and L3 were successfully purified from proteinase K extract  
215 and RNase digested down to free adapters (Figure 2E). 100% of L5 and L3 adapters were  
216 shifted in this manner (Figure 2F) and the method was applied to the RNase digested CLIP  
217 oligonucleotides (Figure 2G). By comparing the ratio of  $\alpha$ L5 to L5 for fresh L5 and L5  
218 extracted from the nitrocellulose membrane in CLIP, the loss in L5 fluorescence from CLIP  
219 could be determined (Figure 2H). L5 consistently lost only ~20% of its fluorescence.

220  
221 **Ligation efficiency.** Three methods were used to estimate ligation efficiency. The most  
222 straightforward of these is to ligate both a fluorescent L5 and L3 adapter and visualize the  
223 single vs dual shift from one or both adapters being ligated (Figure 3A). By quantifying the  
224 amount of fluorescence signal in the single- and dual-ligated protein-RNA complexes,  
225 efficiency estimates are obtained for both 5' and 3' (Figure 3B and C). Assuming the two  
226 ligations are independent events, the total amount of crosslinked RNA is also obtained,  
227 including unlabeled RNA (Figure 3C). This method indicated that L5 ligation efficiencies were  
228 consistent and in the neighborhood of 50% (Figure 3D).

229  
230 It was hypothesized that the higher molecular weight complexes visible in Figure 3A were  
231 produced by variation in the crosslinked protein, such as multimeric hnRNP C. If so, then the  
232 removal of protein by proteinase K digestion would remove the additional bands. To test this,  
233 RNA was extracted from nitrocellulose membranes using proteinase K, purified using either  
234 L5 or L3, run on a polyacrylamide gel, and transferred to a nylon membrane. Consistent with  
235 this hypothesis, higher molecular weight bands were collapsed into two simple smears of  
236 fluorescence, corresponding to mono-ligated and dual-ligated RNA (Figure 3E). A similar  
237 logic as applied in Figure 3A-C was applied to the protein-free RNA in Figure 3E to produce  
238 estimates of ligation efficiencies, which were lower but also consistent between replicates  
239 (Figure 3D, F).

240  
241 A third method was also employed to quantify ligation efficiencies. Because the shifted bands  
242 in Figure 2G have a 1:1 ratio of L: $\alpha$ L oligonucleotides, quantifying antisense oligonucleotides  
243 also quantifies their respective adapters. The development of an antisense oligonucleotide-  
244 based method to quantify low femtomole amounts of adapter necessitated some  
245 optimization, described in Figures S3-8 and associated legends. For example, diluent has  
246 dramatic effects on fluorescence (Figure S5A) and there was a systematic test of the effects  
247 of salt, carrier, and PEG to retain fluorescence, prevent sample loss from adhesion, and  
248 preserve complexes on a gel (Figure S5B-F). Shifting known concentrations of L5 and L3  
249 adapter fit well to a linear model, typically within 3 fmols (Figure S8C-D). By this third method,  
250 L5 ligation efficiencies were ~70% and consistent between CLIP rounds (Figure 3D). From  
251 these three methods, L5 ligation rates are stable between experiments and are roughly  
252 50 $\pm$ 20%. Altogether, results on the loss of adapter fluorescence (Figure 2) and ligation

253 frequency (Figure 3) supported the use of standard aliquots (Figure 2B) to quantify absolute  
254 RNA amounts in CLIP experiments.

255

256 **Crosslink rates for RBPs.** Two measures of RNA cross-linked to protein were determined:  
257 all RNA and minimal region RNA (Figure 4A). “All RNA” reflects the cross-linked RNA on the  
258 nitrocellulose membrane at the minimum size for a small protein-L5 complex (~30 kDa) and  
259 everything larger. Co-purified proteins cross-linked to RNA contribute to the total cross-linked  
260 RNA visualized. However, these are useful numbers because (1) since co-purified proteins  
261 must survive stringent purification conditions, they must constitute a close interaction of the  
262 protein of interest with RNA, and (2) the protein of interest often runs at a range of sizes (i.e.  
263 hnRNP C). The “minimal region” RNA measurement is taken from the region corresponding  
264 to the size for the dominant protein band cross-linked to small RNA fragments and ligated to  
265 L5, a region more likely to correspond to direct cross-linking events (Figure 4A). For all RNA,  
266 hnRNP C and FBL were 37% and 7% crosslinked to RNA, respectively (Figure 4B, see  
267 Figure S2H-I for FBL quantitative western blotting). Cross-link rates for the RBPs hnRNP D  
268 (19%), Rbfox1 (40%), CELF1 (21%), STAU1 (4.9%), PCBP1 (0.5%) and eIF4H (0.3%) were  
269 also established (Figure 4B). Cross-links in the minimal region (Figure 4C) were determined  
270 for RBPs hnRNP C (22%), FBL (2%), Rbfox1 (18%), CELF1 (11%) hnRNP D (5%), STAU1  
271 (1.2%), PCBP1 (0.2%) and eIF4H (0.2%). STAU1 has a reputation as a very poor cross-  
272 linker<sup>13</sup>, so its cross-link rate may be taken as a representative for such.

273

274 The accuracy of this method was tested by calculating the cross-link rate of hnRNP C by  
275 quantitative western blotting of immunopurified hnRNP C (Figure S9). Results from this  
276 method agreed to within ~10%. It was asked if easyCLIP would reflect a loss in RNA-binding  
277 affinity caused by the F54A mutant of hnRNP C, a mutation in the RNA-binding surface of  
278 the RRM that elevates the RRM's *in vitro*  $K_D$  from ~1  $\mu$ M to >20  $\mu$ M<sup>14</sup>. The mutant was  
279 dramatically less cross-linked (Figure 4C,  $P < 0.05$  t-test), although it still cross-linked better  
280 than the average human non-RBP (discussed below), consistent with hnRNP C functioning  
281 in a complex and possessing RNA contacts outside the RRM.

282

283 **Cross-link rates for non-RBPs.** Quantification of cross-link rates may identify a numerical  
284 threshold for distinguishing RBPs from non-RBPs and for determining when an RBP has lost  
285 or gained RNA-binding activity. To derive a distribution of cross-link rates for non-RBPs, 11  
286 non-RBP proteins were randomly selected using a script. This set of randomly selected non-  
287 RBPs cover a diverse range of functions and subcellular locations (Figure 4C-D). Selected  
288 non-RBPs had total RNA crosslink values of 0.03-2% (Figure 4F-G, Figure S10), and rates  
289 correlated with protein size (Figure S10B). Reducing counts to minimal region RNA dropped  
290 all cross-link rates except UBA2 to below 0.1%, and UBA2 to 0.16% (Figure 4G).

291

292 **Cross-linking rates distinguish RBPs and non-RBPs.** Data above indicate that cross-link  
293 rates derived from a minimal region are typically below 0.1% for non-RBPs and above 0.1%  
294 for RBPs. The amount of total cross-linked RNA purified, not just that in the minimal region,  
295 ranges greatly (non-RBPs 0.1-2%, RBPs 0.2-42%). These metrics can be used to aid in  
296 defining what proteins are RBPs. For example, FHH-hnRNP C F54A had a minimal region



297 cross-link rate of 0.1%, consistent with losing most direct affinity for RNA but still joining an  
298 RNA-binding complex.

299  
300 **Defining specific interactions of RBPs and non-RBPs.** One of the goals of this study was  
301 to enable target RNAs to be defined for a protein of interest as those interactions with a  
302 frequency per protein or per-cross-link unlikely to occur with a randomly selected protein. To  
303 do so, easyCLIP libraries for the ten of the eleven random non-RBPs were prepared. The  
304 specificity of the resulting libraries was confirmed by the over-representation of each  
305 overexpressed protein's own RNA in CLIP data (Figure S10C). Despite not being RBPs,  
306 different non-RBPs produced distinct RNA-interactions (Figure 4H, Figure S10D). The two  
307 solely-nuclear proteins UBA2 and ETS2 had a low fraction of mRNA reads (Figure 4H).

308  
309 Using the resulting distribution of RNA interactions for random proteins, it is possible to  
310 directly estimate how “unusual” any RNA-protein interaction pair is. This method was first  
311 applied to interaction frequencies per cross-link (i.e. per read). The validity of this method is  
312 supported by the identification of the expected motif for all eight RBPs as the top motif (Figure  
313 1F), and target RNA types were consistent with expectations (Figure 1I): FBL targeted  
314 snoRNA, while hnRNPs targeted mRNA, and the core snRNP component SF3B1 targeted  
315 mRNA and snRNA. The number of FBL mRNA targets at least partly reflects mRNAs  
316 containing intronic snoRNAs. For each non-RBP, its own targets were defined after removing  
317 it from the set of controls, yet this still resulted in few “target” RNAs.

318  
319 Finally, we identified target RNAs as those bound *per protein* at an unusually high rate.  
320 Frequent mRNA and lncRNA interactions per protein are characteristic of RBPs (Figure 4H).  
321 The rate of cross-linking per protein was plotted as a histogram to all mRNAs (Figure 5, *left*),  
322 snoRNAs (*middle*), or tRNA (*right*), which suggested some fundamental results. First, the  
323 distribution of binding across mRNAs, in reads-per-million, is similar between RBPs and non-  
324 RBPs (*top left*), but RBPs have many more frequent mRNA partners per protein. snoRNA  
325 presents a different picture (*middle*). Naïvely, if one looked only at reads-per-million, it would  
326 seem that either randomly selected proteins target snoRNA, or else RBPs somehow  
327 specifically avoid it. Per-protein, however, mRNA-binding RBPs and non-RBPs are equally  
328 likely to contact snoRNA – consistent with only FBL having specific interactions with snoRNA  
329 (*bottom middle*). The reason for this is clear enough – mRNA-binding RBPs have additional  
330 interactions that decrease the fraction of total interactions that occur with snoRNA. Despite  
331 its extremely high cross-link rate to mRNA, hnRNP C cross-links to snoRNA the same a  
332 random protein, as expected from such interactions being random. This cautionary tale helps  
333 explain the tRNA-binding observed by PCBP1 (Figure 1G). Like snoRNAs, tRNAs make up  
334 a disproportionate share of the libraries of non-RBPs (*top right*), but per-protein all RBPs and  
335 non-RBPs have the same distribution (*bottom right*). The distribution of tRNA binding by  
336 PCBP1 is actually just that of a non-RBP, indicating that it has no evolved interaction with  
337 tRNA, as might have been thought from conventional analysis in the absence of randomly  
338 selected non-RBPs.

339  
340 **Cancer-associated mutations.** The most frequent missense mutations in RBPs were  
341 identified in cancer using TCGA data<sup>15</sup> (Figure 6A). The K700E mutant of SF3B1, the  
342 L100P/L100Q mutants of PCBP1 (Figure 6B), and the P131L mutant of RQCD1 were

343 selected. SF3B1 K700E and RQCD1 P131L did not have obvious effects on RNA-binding in  
344 preliminary experiments, so PCBP1 was focused on for analysis.

345  
346 PCBP1 is both transcription factor and RBP, both nuclear and cytoplasmic, and highly  
347 multifunctional beyond RNA-binding<sup>16,17</sup>. As a result, PCBP1 was expected to cross-link less  
348 than the average RBP. The cross-link rate of wild-type PCBP1 was indeed higher than non-  
349 RBPs, but lower than other RBPs (Figure 6C and D). To test if cross-linking was specific,  
350 GxxG loop mutations were introduced in all three KH domains of PCBP1, which remove the  
351 affinity of KH domains for RNA while allowing the domains to fold properly<sup>18</sup>. “GxxG PCBP1”  
352 no longer cross-linked to RNA (<0.01%, Figure 6C).

353  
354 The effects of the PCBP1 L100 mutation were next examined. The first and second KH  
355 domains of the closely related protein PCBP2 form a pseudo-dimer, in which the  $\beta$ 1 and  $\alpha$ 3  
356 elements of both KH1 and KH2 bury hydrophobic residues against the other domain to form  
357 an intramolecular dimer<sup>19</sup>. L100, in  $\beta$ 1 of KH2, is part of this dimerization surface<sup>19</sup>,  
358 suggesting L100 mutants might alter conformation to impair RNA-binding.

359  
360 Surprisingly, the opposite effect was observed: L100P/Q PCBP1 was three-fold *more* cross-  
361 linked to RNA (Figure 6C-E). L100P/Q PCBP1 was dramatically destabilized (Figure 6F,  
362 Figure S11). Expressing PCBP1 from a vector containing an upstream ORF that lowered  
363 expression to below that of L100P/Q PCBP1 (Figure 6F) did not substantially increase cross-  
364 link rate (Figure 6C, D), ruling out expression levels as the cause of differential RNA-binding.  
365 These results indicate most of the wild-type protein is not bound to RNA in HCT116.  
366 Interestingly, if the entire KH domain containing L100 (KH2) is removed, cross-linking was  
367 approximately the same as wild-type (Figure 6C, D), yet  $\Delta$ KH2 PCBP1 was also destabilized  
368 (Figure 6F, Figure S11).

369  
370 L100P/Q mutants had a much smaller fraction of reads mapping to snRNA (Figure 6G), and  
371 on a per protein basis, L100P/Q greatly increased its association with mRNA (Figure 6H). It  
372 was therefore hypothesized that L100P/Q PCBP1 was more cytoplasmic than wild-type  
373 PCBP1, which was confirmed by microscopy (Figure S12, Figure 6I).  $\Delta$ KH2’s location was  
374 unaltered (Figure S12).

375  
376 The quantifications done by easyCLIP allow for new insight, as three different views of RNA-  
377 protein interactions are enabled (Figure 6J-N). Binding to snRNA by L100 PCBP1 is reduced  
378 per protein, but on a per cell basis it is clear the snRNA association of PCBP1 collapses in  
379 the L100P/Q mutants (Figure 6J, M). Although mutant PCBP1 interacts more often with  
380 mRNA per protein, per cell it is similar (Figure 6J, K, L). We note that the increase in GSK3A  
381 association is strong enough to overcome the effect of reduced abundance (Figure 6L).  
382 Altogether, Figure 5 and Figure 6J-N highlight the complexity of RNA-protein interactions,  
383 and how misled one might be if restricted only to analyzing CLIP data on the traditional basis  
384 of read distributions.

### 385 386 **Discussion**

387 easyCLIP provides a general method for estimating RNA-per-protein cross-link rates.  
388 easyCLIP is easy, fast, reliable, and efficient. It provides direct visualization of the success of

389 library preparation steps, allows multiplexing based on two adapters, and determines ligation  
390 efficiency. A major limitation to this approach is its reliance on UV cross-linking as a proxy for  
391 *in vivo* interactions<sup>20</sup>.

392

393 These PCBP1 results are consistent with a model where the L100P/Q mutations impair the  
394 stabilizing effect of KH2 and have a gain-of-function for KH2 with regards to location and  
395 RNA-binding. To the author's knowledge, this is the first time a disease-associated mutation  
396 in an RBP has resulted in increased RNA-association.

397

398 PCBP1 protein is often down-regulated in cancer, which aids in tumorigenesis<sup>21</sup>. It is likely  
399 that the L100P/Q mutations contribute to tumorigenesis at least partly by destabilizing  
400 PCBP1. However, L100P/Q is only observed at high frequency in colon and rectal  
401 adenocarcinoma and down-regulation cannot explain the selection of a specific missense  
402 mutation. PCBP1 has been proposed to suppress tumors by binding mRNA and stabilizing  
403 tumor suppressor mRNAs, repressing translation of oncogenic mRNAs, and inhibiting  
404 oncogenic splicing<sup>21</sup>. The changes per cell we observe, however, indicate that while the  
405 landscape of PCBP1-RNA interactions is radically altered, the number of mRNA-PCBP1  
406 complexes are similar with L100 mutants, and rather point to either changes in regulatory  
407 effect or a loss of function in splicing.

408

#### 409 **Methods**

410 The easyCLIP protocol is described in File S1 with additional information in Supplementary  
411 Methods. Full methods are in the Supplementary Methods section. High-throughput  
412 sequencing data is under the GEO accession GSE131210.

413

#### 414 **Acknowledgments**

415 We thank Brian Zarnegar for reagents, and input on experiments and their interpretation. We  
416 thank Amin Zia for performing analysis of TCGA data to identify missense mutations in RBPs  
417 in cancer. We thank Zurab Siprashvili and Yuning Wei for assistance. The SF3B1 sequence  
418 was obtained from a vector produced by Angelos Constantinou, provided by Marc-Henri  
419 Stern. Funding was provided by the NIAMS/NIH grant 1F32AR072504 to D.F.P., NIAMS/NIH  
420 grants AR45192, AR007422 and AR49737 to P.A.K., and by a USVA Merit Review grant to  
421 P.A.K. Some data was generated on an Illumina HiSeq 4000 purchased with funds from NIH  
422 award S10OD018220 by SFGF at Stanford.

423

#### 424 **Author Contributions**

425 D.F.P. wrote the software and conceived, designed, performed and analyzed all  
426 experiments. P.K. and D.F.P. planned experiments and wrote the paper.

427

#### 428 **Declaration of Interests**

429 The authors declare they have no competing interests.

430

431

432 **References**

- 433 1. Chakrabarti, A. M., Haberman, N., Praznik, A., Luscombe, N. M. & Ule, J. Data  
434 Science Issues in Studying Protein–RNA Interactions with CLIP Technologies.  
435 *Annu. Rev. Biomed. Data Sci.* **1**, 235–261 (2018).
- 436 2. Janes, K. A. An analysis of critical factors for quantitative immunoblotting. *Sci.*  
437 *Signal.* **8**, rs2 LP-rs2 (2015).
- 438 3. Jarmoskaite, I. *et al.* A Quantitative and Predictive Model for RNA Binding by  
439 Human Pumilio Proteins. *Mol. Cell* (2019).  
440 doi:<https://doi.org/10.1016/j.molcel.2019.04.012>
- 441 4. Liu, Y. *et al.* Comparative Molecular Analysis of Gastrointestinal  
442 Adenocarcinomas. *Cancer Cell* **33**, 721–735.e8 (2018).
- 443 5. Granneman, S., Kudla, G., Petfalski, E. & Tollervy, D. Identification of protein  
444 binding sites on U3 snoRNA and pre-rRNA by UV cross-linking and high-  
445 throughput analysis of cDNAs. *Proc. Natl. Acad. Sci.* **106**, 9613 (2009).
- 446 6. Porter, D. F., Koh, Y. Y., VanVeller, B., Raines, R. T. & Wickens, M. Target  
447 selection by natural and redesigned PUF proteins. *Proc. Natl. Acad. Sci. U. S. A.*  
448 **112**, 15868–15873 (2015).
- 449 7. Benhalevy, D., McFarland, H. L., Sarshad, A. A. & Hafner, M. PAR-CLIP and  
450 streamlined small RNA cDNA library preparation protocol for the identification of  
451 RNA binding protein target sites. *Protein-RNA Struct. Funct. Recognit.* **118–119**,  
452 41–49 (2017).
- 453 8. Zarnegar, B. J. *et al.* irCLIP platform for efficient characterization of protein–RNA  
454 interactions. *Nat. Methods* **13**, 489–492 (2016).
- 455 9. Castello, A. *et al.* Insights into RNA Biology from an Atlas of Mammalian mRNA-  
456 Binding Proteins. *Cell* **149**, 1393–1406 (2012).
- 457 10. Heinz, S. *et al.* Simple combinations of lineage-determining transcription factors  
458 prime cis-regulatory elements required for macrophage and B cell identities. *Mol.*  
459 *Cell* **38**, 576–589 (2010).
- 460 11. Zhang, C. & Darnell, R. B. Mapping in vivo protein-RNA interactions at single-  
461 nucleotide resolution from. *Nat. Biotechnol.* **29**, 607–614 (2011).
- 462 12. Kishore, S. *et al.* Insights into snoRNA biogenesis and processing from PAR-CLIP  
463 of snoRNA core proteins and small RNA sequencing. *Genome Biol.* **14**, R45–R45  
464 (2013).
- 465 13. Kim, B. & Kim, V. N. fCLIP-seq for transcriptomic footprinting of dsRNA-binding  
466 proteins: Lessons from DROSHA. *Methods* (2018).  
467 doi:<https://doi.org/10.1016/j.ymeth.2018.06.004>
- 468 14. Cieniková, Z., Damberger, F. F., Hall, J., Allain, F. H.-T. & Maris, C. Structural and  
469 Mechanistic Insights into Poly(uridine) Tract Recognition by the hnRNP C RNA  
470 Recognition Motif. *J. Am. Chem. Soc.* **136**, 14536–14544 (2014).
- 471 15. Network, T. C. G. A. R. *et al.* The Cancer Genome Atlas Pan-Cancer analysis  
472 project. *Nat. Genet.* **45**, 1113 (2013).
- 473 16. Meng, Q. *et al.* Signaling-dependent and coordinated regulation of transcription,  
474 splicing, and translation resides in a single coregulator, PCBP1. *Proc. Natl. Acad.*  
475 *Sci. U. S. A.* **104**, 5866–5871 (2007).
- 476 17. Makeyev, A. V & Liebhaber, S. A. The poly(C)-binding proteins: a multiplicity of  
477 functions and a search for mechanisms. *RNA* **8**, 265–278 (2002).

- 478 18. Hollingworth, D. *et al.* KH domains with impaired nucleic acid binding as a tool for  
479 functional analysis. *Nucleic Acids Res.* **40**, 6873–6886 (2012).
- 480 19. Du, Z., Fenn, S., Tjhen, R. & James, T. L. Structure of a Construct of a Human  
481 Poly(C)-binding Protein Containing the First and Second KH Domains Reveals  
482 Insights into Its Regulatory Mechanisms. *J. Biol. Chem.* **283**, 28757–28766  
483 (2008).
- 484 20. Ramanathan, M., Porter, D. F. & Khavari, P. A. Methods to study RNA–protein  
485 interactions. *Nat. Methods* **16**, 225–234 (2019).
- 486 21. Guo, J. & Jia, R. Splicing factor poly(rC)-binding protein 1 is a novel and  
487 distinctive tumor suppressor. *J. Cell. Physiol.* **234**, 33–41 (2019).
- 488



Absolute quantification of ligated RNA

Fig 2

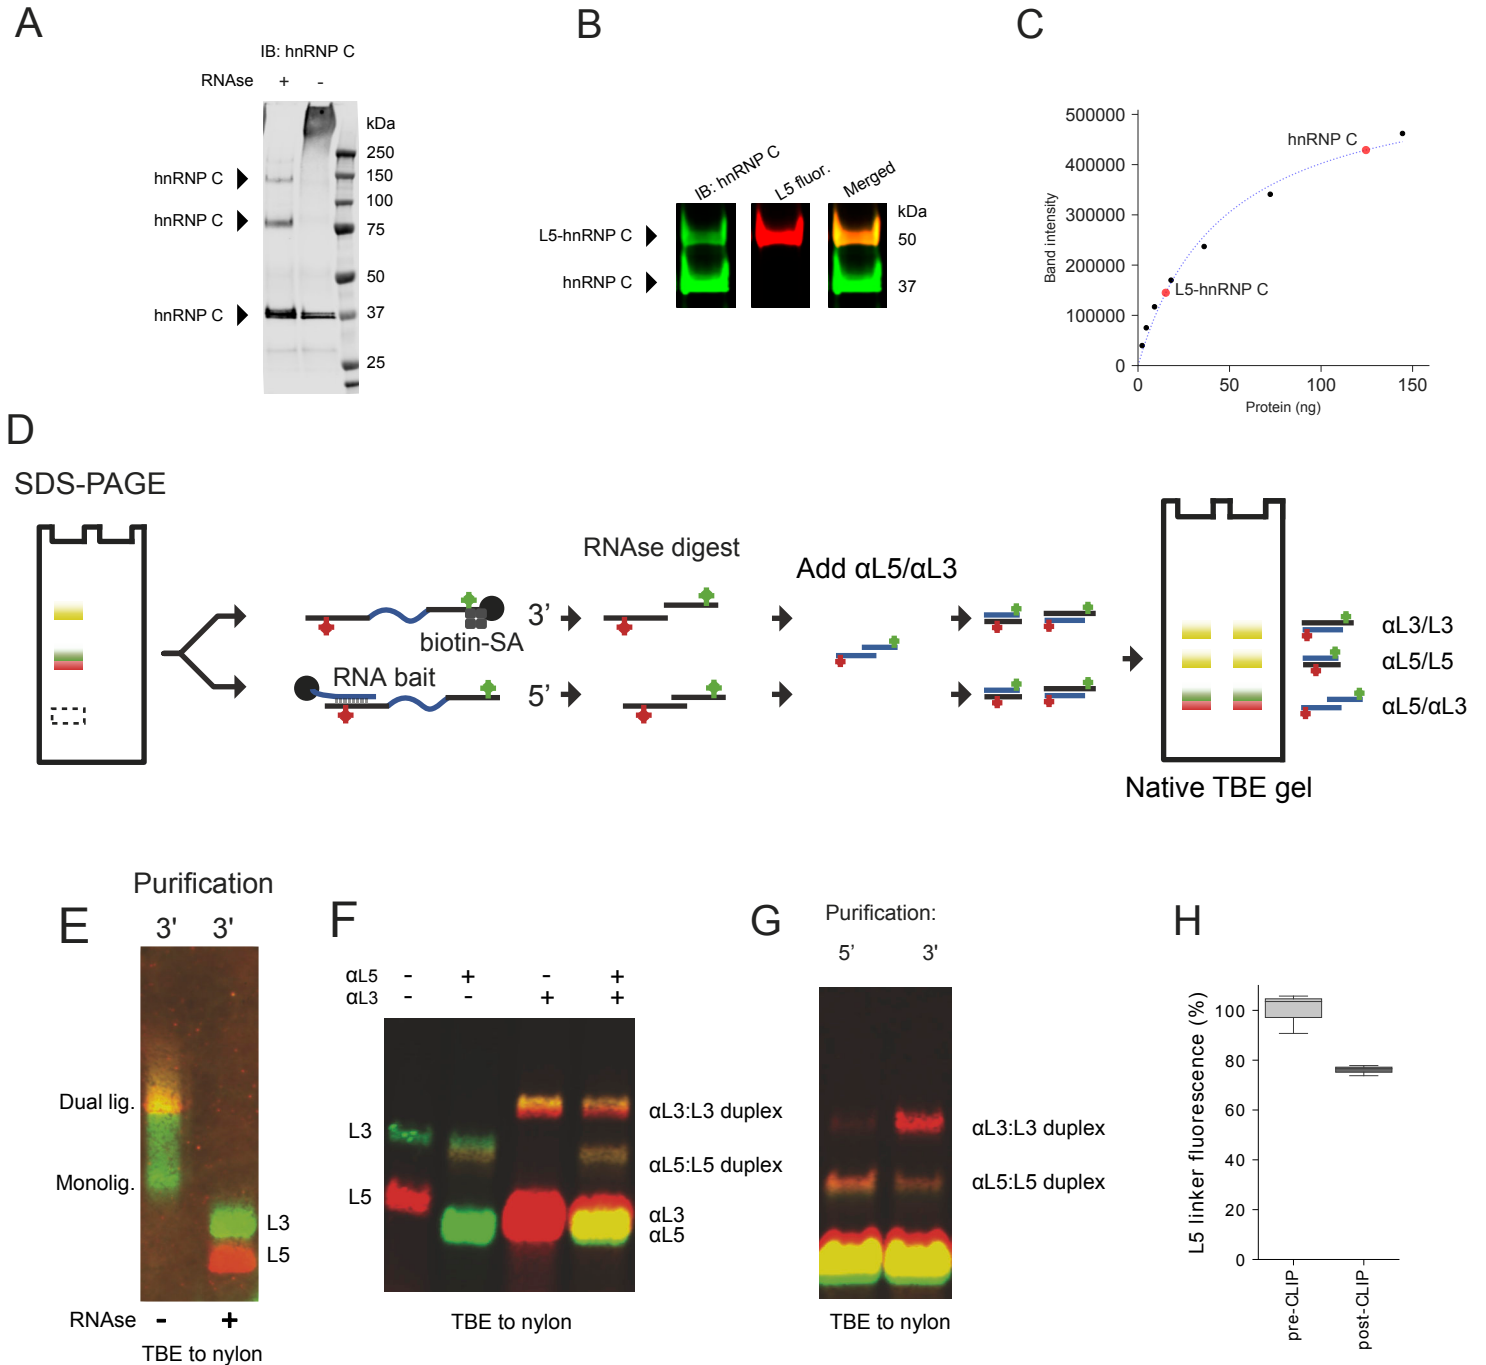

### Accounting for ligation efficiency

Fig 3

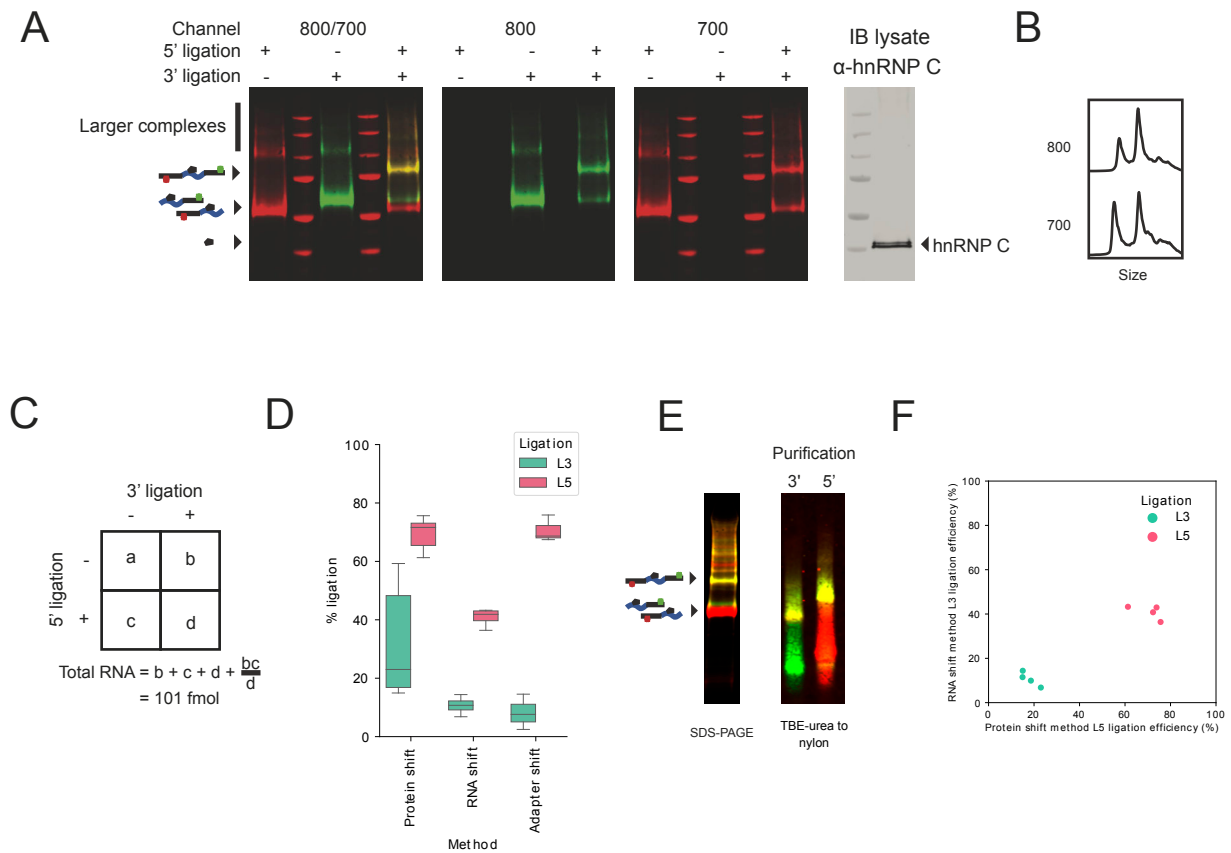



RNA cross-link rates for RBPs and non-RBPs are both diverse and distinct

Fig 4

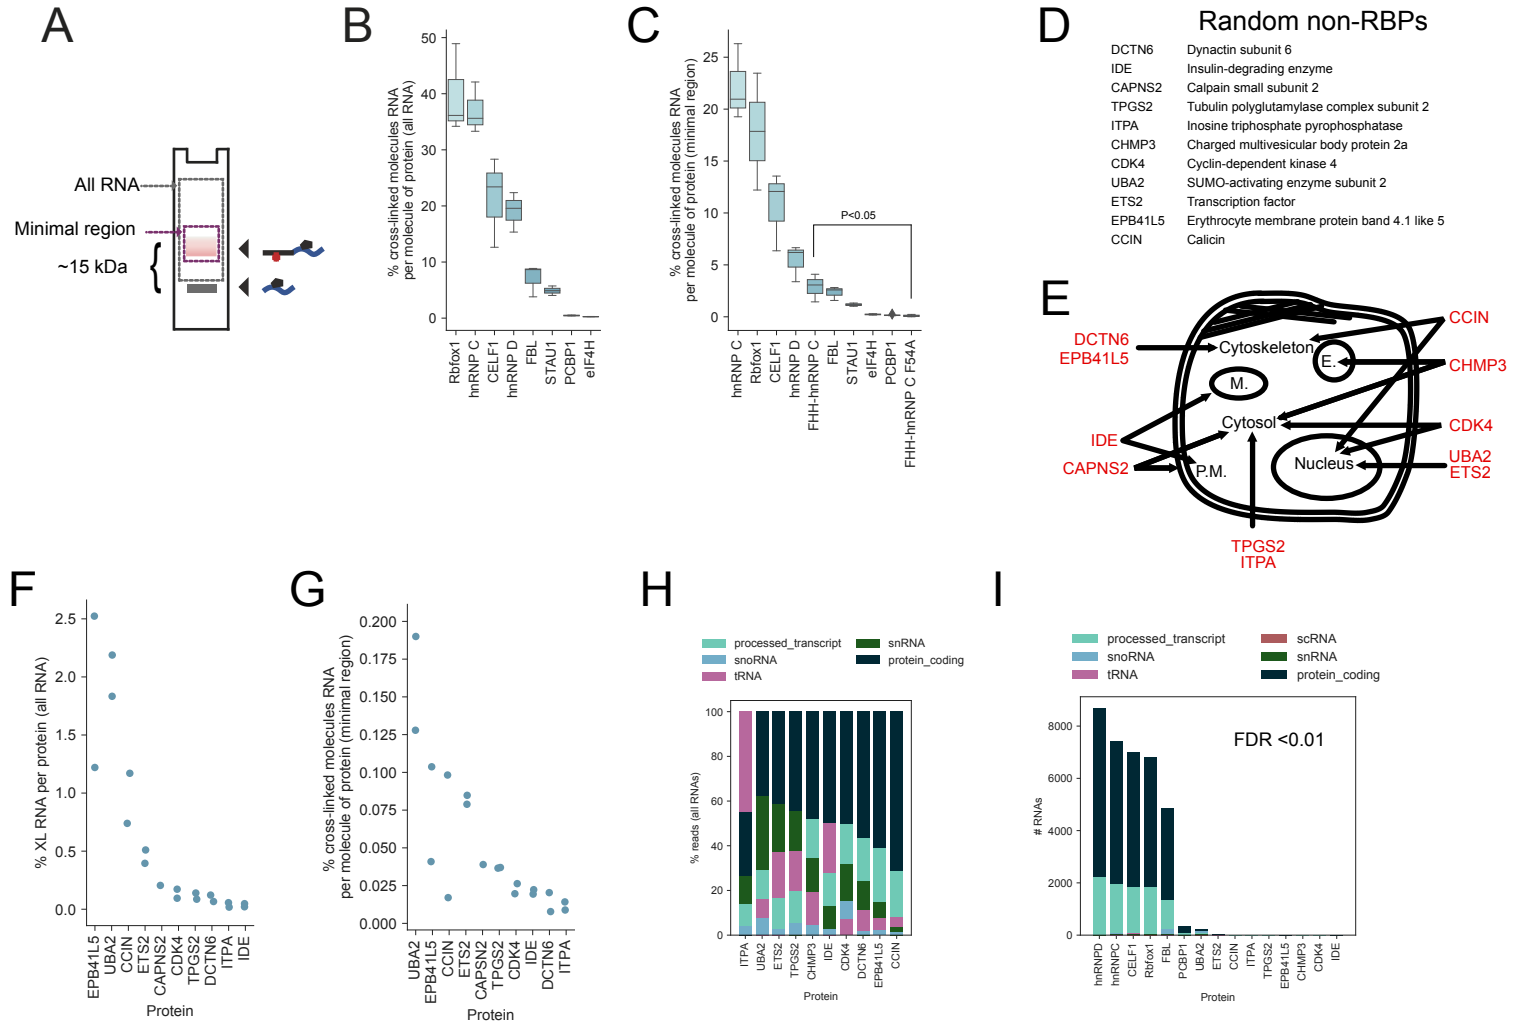

Defining specific interactions for RBPs and non-RBPs by random protein sampling

Fig 5

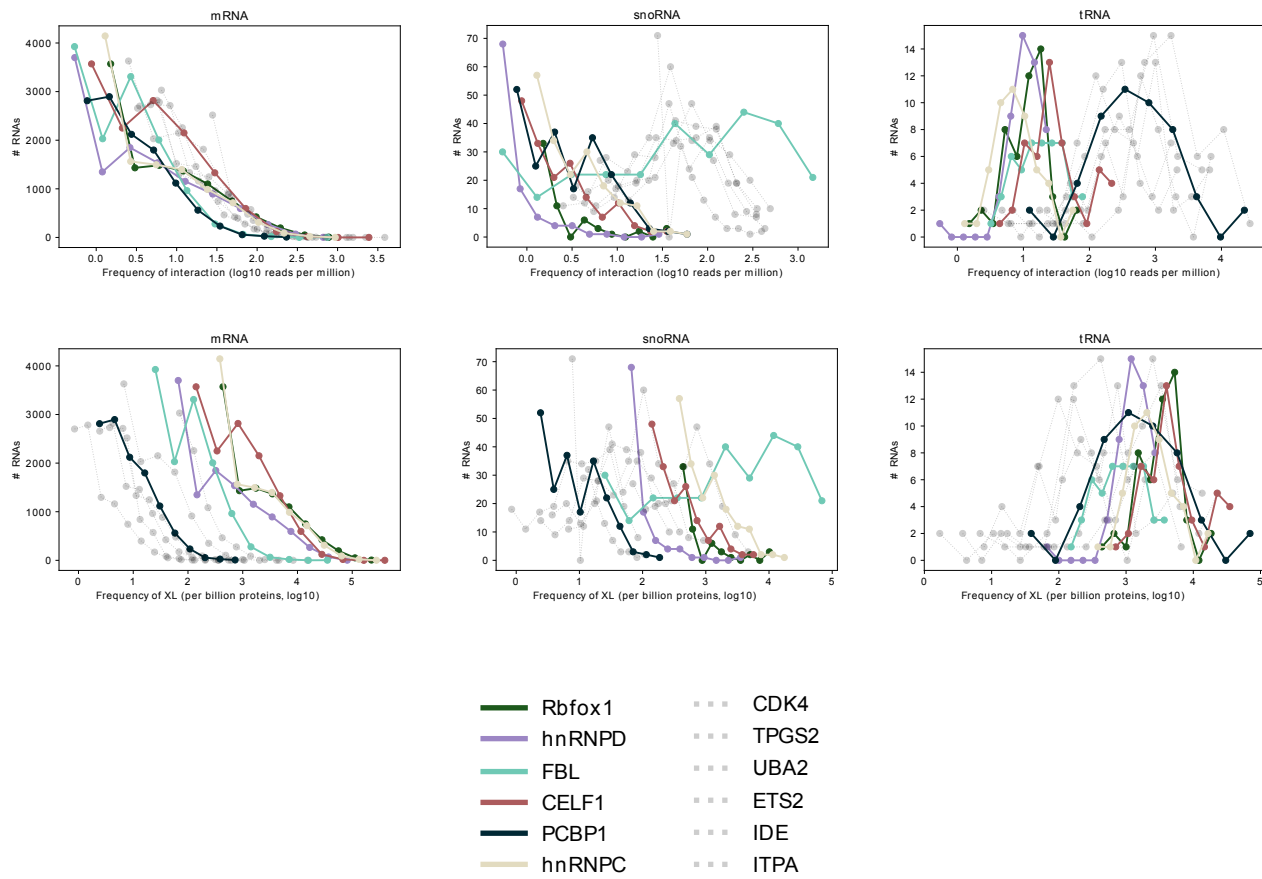

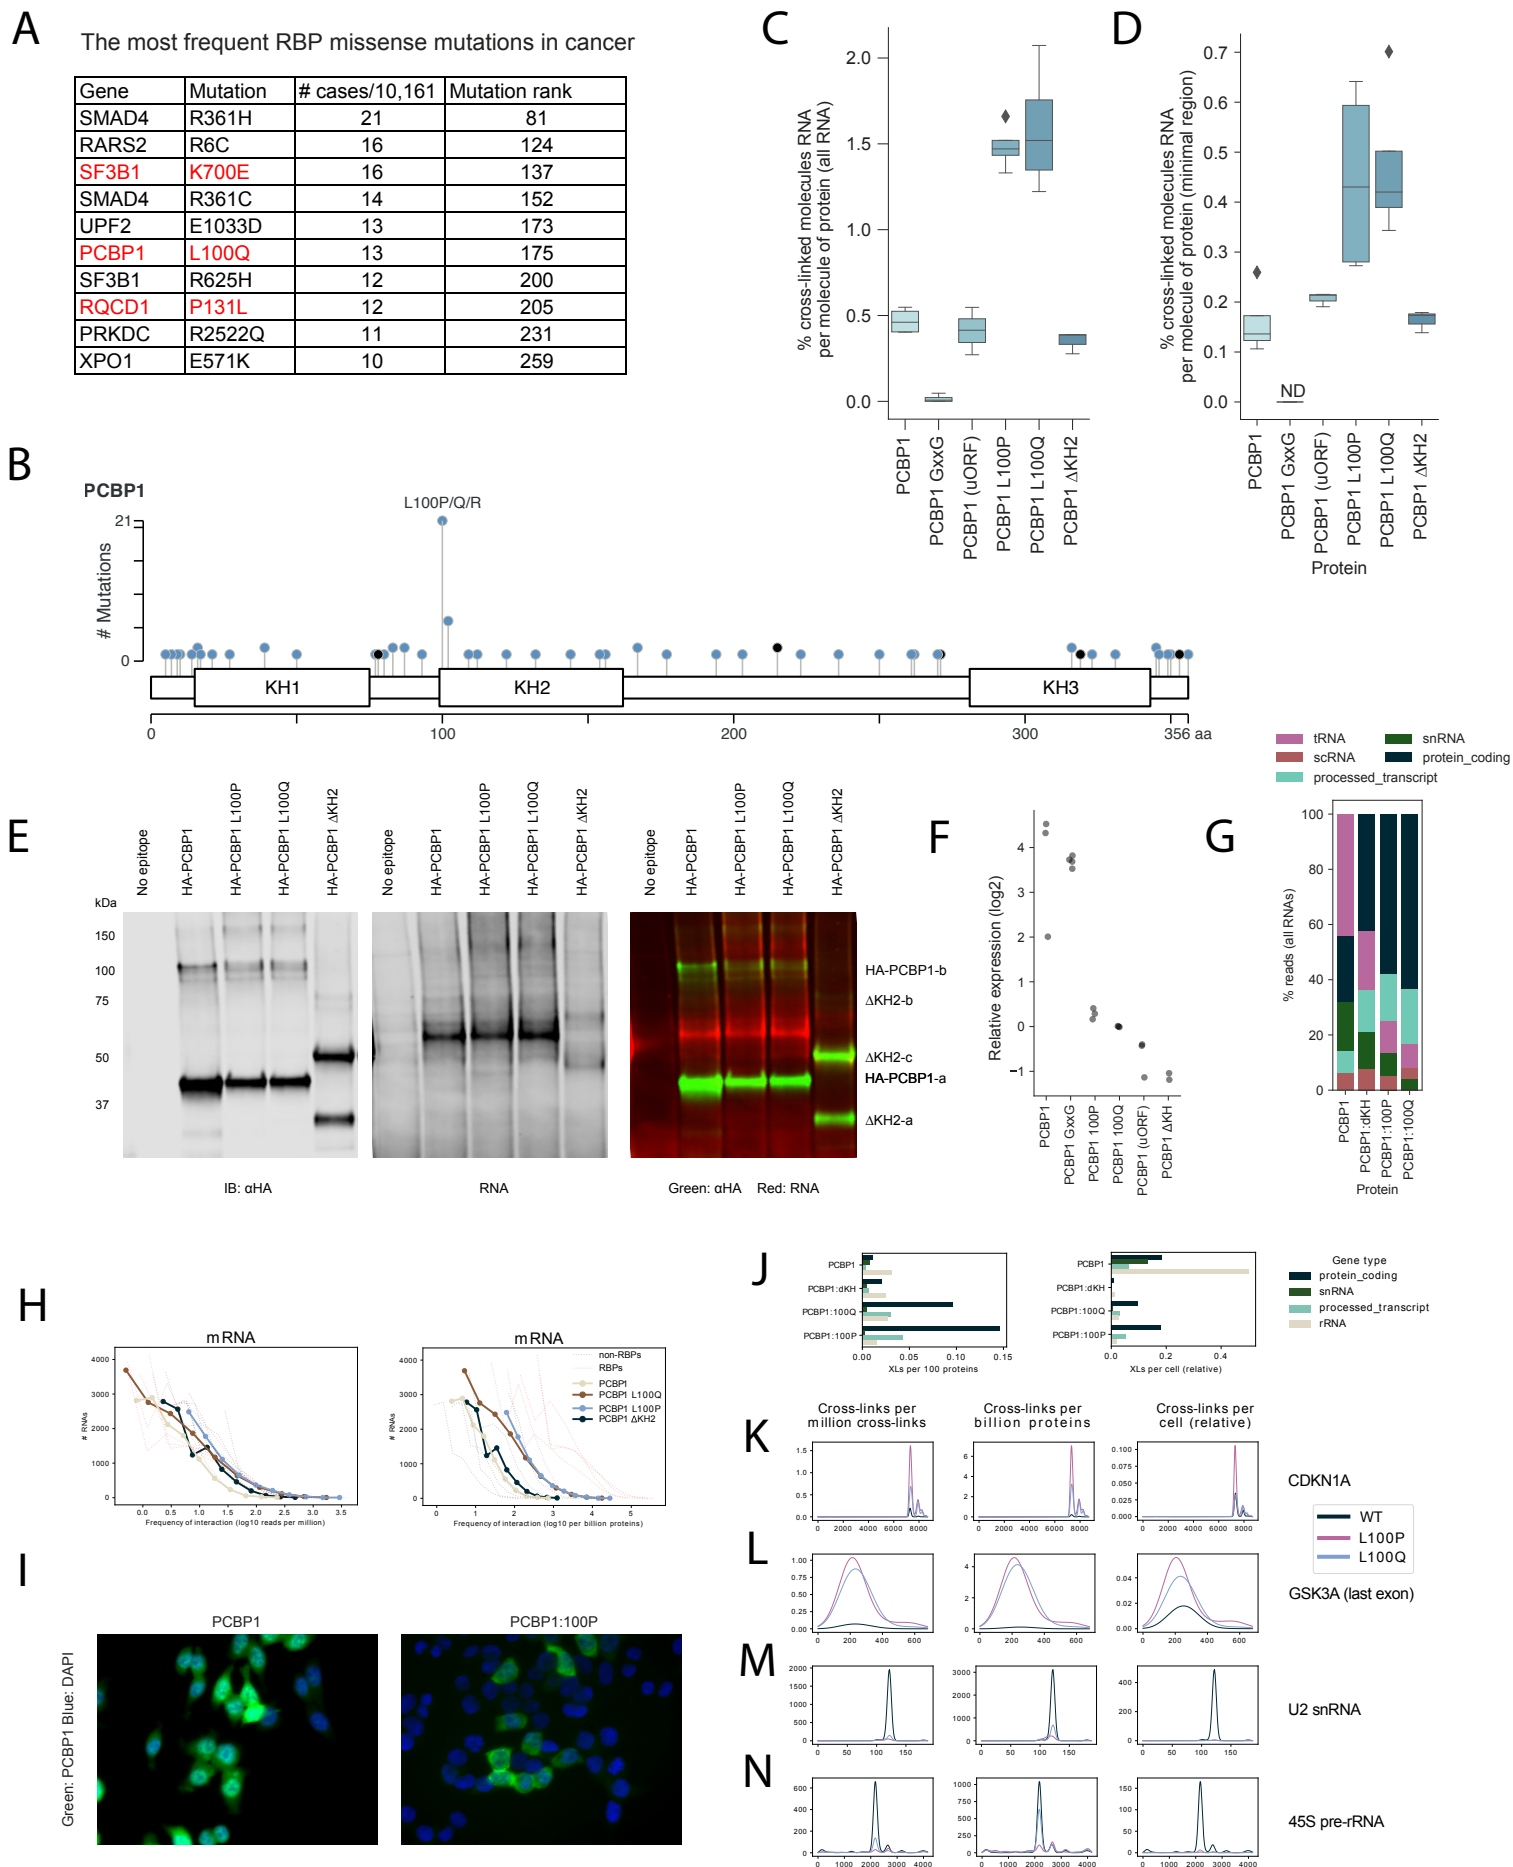

1 **Supplementary material**

2

3 **Supplementary files**

4 **File 1** The full easyCLIP protocol and oligonucleotide sequences.

5

6 **File 2** Description of high-throughput sequencing datasets included in this study.

7

8 **File 3** Raw counts, counts per million reads, and counts per ten billion proteins for all proteins.

9

10 **File 4** P values for all proteins across all RNAs, determined by negative binomial fits to  
11 random non-RBPs in all cases.

12

13 **File 5** Peak locations for all proteins in all RNAs.

14 **Supplementary figures**

15 **Figure S1 A** Comparison of easyCLIP with eCLIP. The comparison used the same amount  
16 of the same anti-RBFOX2 antibody, the same cell line, and the same number of cells to  
17 perform easyCLIP on RBFOX2. eCLIP produced 72 fmols of library after 16 PCR cycles per  
18 replicate, as reported<sup>1</sup>, while easyCLIP produced ~13,000 fmols of library after the same  
19 number of cycles per replicate (n=3, extrapolating from PCR amplification of 16% of RT  
20 reactions). E.L. Van Nostrand *et al.* state that at 100% PCR efficiency their largest replicate  
21 would reach 100 fmol after 13 PCR cycles<sup>1</sup>. Dividing 100 fmol by 2<sup>13</sup> gives an initial library  
22 size of 12 amol for eCLIP (7 million molecules) and a PCR efficiency of 86%. The subsequent  
23 information on RBFOX2 mapping in E.L. Van Nostrand *et al.*<sup>1</sup> could not have come from this  
24 benchmark sample, as the authors report 85% unique reads at 20 million reads sequencing  
25 depth, impossible with a starting library of 7 million. eCLIP performed a size selection on their  
26 amplified library before sequencing, so the fraction of the input 12 amol that was usable is  
27 unknown. This easyCLIP sample did not undergo size selection before sequencing, resulting  
28 in many inserts too small to map, but 16% of reads were mappable. If easyCLIP PCR was  
29 96% efficient (vs 86% for eCLIP), the starting pool would still be 370 amols. RBFOX2 data  
30 was obtained without substantial optimization (three RNase concentrations were tried) –  
31 suggesting RBFOX2 does not represent an optimal case but a typical case. **B** Snapshot of  
32 the IGV browser viewing easyCLIP RBFOX2 reads at the same NDEL1 locus as shown in  
33 E.L. Van Nostrand *et al.*<sup>1</sup> Figure 1D, showing identification of the same binding sites. Note  
34 that the scale bar in E.L. Van Nostrand *et al.* is reads per million, while the scale here is  
35 simply raw reads. Reads are placed according to their 5' end location with a single nucleotide  
36 width. The GCATG\_+.wig tract in red shows the location of GCATG motifs (the Rbfox2  
37 binding site) on the plus strand, with a value of one placed on GCATG, a value of two placed  
38 on TGCATG (a preferred form of the motif), and allowing values to sum. **C** Unique mapped  
39 reads for eight RBPs. All data was obtained from 293T cells except PCBP1 was obtained  
40 from the colon cancer cell line HCT116. Cellular inputs ranged from below 10 million cells  
41 (hnRNP C, exact number not recorded), to 10 million (one RBFOX2 replicate), to 20 million  
42 (two RBFOX2 replicates), to a maximum of a 15 cm plate. RBFOX2, FBL, and hnRNP C  
43 libraries were obtained from antibodies to the endogenous proteins, the others were obtained  
44 from FLAG tag purifications from either constructs either integrated at the AAVS1 locus  
45 (PCBP1) or transiently over-expressed from a pLEX vector (the others).

46  
47 **Figure S2** Quantification of purified recombinant protein and its application to absolute  
48 quantitation of immunopurified protein in CLIP. **A** Quantification of immunopurified  
49 endogenous hnRNP C using a GST-hnRNP C standard. The gel is a western blot probed  
50 with antibodies to hnRNP C. Endogenous hnRNP C is smaller than GST-hnRNP C but is  
51 shown at the same vertical position in this panel as GST-hnRNP C for visualization. In the  
52 graph, black dots represent GST-hnRNP C standards, the blue line is a best fit hyperbolic  
53 curve, and the red dot is immunopurified endogenous hnRNP C. **B** Quantification of purified  
54 GST-hnRNP C expressed in *E. coli*. GST-tagged hnRNP C was purified from *E. coli* using  
55 glutathione resin, and then run next to a standard curve of BSA protein on an SDS-PAGE  
56 gel. Gel was stained with Coomassie and fluorescence measured at 700 nm. In the graph,  
57 black dots represent BSA standards, the dotted line is a fit hyperbolic curve, and the red dot  
58 represents the purified GST-hnRNP C, its position on the y-axis determined from the  
59 standard curve. The larger graph is focused on the lower quantities of GST-hnRNP C, while

60 the larger graph is the same graph zoomed out to include all standards. **C** Quantification of  
61 GST-hnRNP C using a tryptophan-reactive dye (Bio-Rad Stain-Free Gel). Gel was  
62 subsequently stained with Coomassie to determine Coomassie staining of GST-hnRNP C  
63 and BSA was not biased. **D** Coomassie quantification of purified, recombinant GST-FLAG-  
64 HA-His-CSRP2 (GST-FHH-CSRP2), the HA standard. CSRP2 was used in this construct  
65 because this fusion protein purifies in very high quantities. The hyperbolic curve fit is as in  
66 panel B. **E** Quantification of GST-FHH-CSRP2 using a tryptophan reactive-dye to test for a  
67 bias in Coomassie-staining of the HA standard. No bias was observed. **F** Comparison of the  
68 quantification standards for HA and hnRNP C. Dilutions of each standard were run on the  
69 same gel and western blotted for GST. The standard curve of each protein stock was used  
70 to estimate the quantities of the other stock. The proximity of the dots to the 45° line indicate  
71 a good agreement. **G** The 4F4 anti-hnRNP C antibody shows little bias between cross-linked  
72 and non-cross-linked hnRNP C. Recombinant GST-hnRNP C (made in-house) was  
73 incubated with a poly(U)<sub>10</sub> RNA oligonucleotide (IDT) and UV cross-linked. The resulting  
74 mixture, along with GST-hnRNP C (Abnova) standards was run on a denaturing SDS-PAGE  
75 gel and transferred to a nitrocellulose membrane for immunoblotting against hnRNP C (4F4)  
76 or GST. No significant difference between anti-GST and anti-hnRNP C antibodies in the ratio  
77 of cross-linked to non-cross-linked hnRNP C was observed. **H** Coomassie quantification of  
78 purified, recombinant FBL. Purified FBL protein (Prospec, enz-566) was comprised of FBL  
79 amino acids 83-321 with an added 23 amino acid tag added, and the FBL antibody (Bethyl,  
80 A303-891A) was made against an immunogen between amino acids 271-321 of FBL. As a  
81 result, the purified FBL runs faster than endogenous FBL, but both share the entire  
82 immunogen used for immunoblotting. **I** Immunoblot quantification of immunopurified FBL  
83 using the recombinant FBL visualized in panel H.

84

85 **Figure S3.** A staple oligonucleotide may be used to shift the antisense oligonucleotides in  
86 Figure 2D in a single molecule to determine relative fluorescence and control both adapter  
87 quantifications to a single complex.

88

89 **Figure S4** Fluorescence on nylon and nitrocellulose for dot blots of  $\alpha$ L3 and  $\alpha$ L5 labelled  
90 respectively with IR680RD and IR800CW. Signal remains high on nylon, but decays on  
91 nitrocellulose

92

93 **Figure S5** Developing a method to quantify low fmol amounts of adapter. **A** The choice of  
94 dilution solution has a large effect on fluorescence. An equimolar mixture of  $\alpha$ L3 and  $\alpha$ L5 was  
95 dilute to 1 nM in the indicated solutions. 2  $\mu$ L (2 fmols) of diluted oligonucleotide were then  
96 dot blotted on nylon and fluorescence measured on a Li-Cor scanner. Carrier DNA was an  
97 equimolar solution of 10, 15, and 35 nucleotide poly(A) oligonucleotides. **B** Fluorescence per  
98 fmol of  $\alpha$ L3 oligonucleotide after diluting to 10 nM in 50 mM Tris pH 7.5 with the indicated  
99 salts and blocking agents. Carrier DNA was an equimolar solution of 10, 15, and 35  
100 nucleotide poly(A) oligonucleotides at the indicated ng/ $\mu$ L concentrations. All PEG solutions  
101 had 10 ng/ $\mu$ L carrier DNA. Carrier DNA is not sufficient to block signal loss upon dilution.  
102 Both monovalent and divalent salts had similar effects. PEG400 and PEG8000 both  
103 preserved signal, and higher concentrations generally worked better. **C** The 10 nM solution  
104 in panel B was diluted to 1 nM. PEG400 leads to slightly higher fluorescence than PEG8000.  
105 Solutions lacking PEG are not depicted due to low signal to noise ratios. **D** Retention of signal

106 during a 10-fold dilution. Retention is the fluorescence per fmol of the 1 nM solution divided  
107 by the fluorescence per fmol of the 10 nM. The choice of salt has no consistent effect. Higher  
108 PEG concentrations are better blocking agents. PEG400 and PEG8000 have a similar  
109 performance as blocking agents. **E** The choice of 50 mM NaCl or 10 mM MgCl<sub>2</sub> has no effect  
110 on oligonucleotide loss during dilution (retention) or on signal per fmol. **F** It is safe to run DNA  
111 duplexes on 20% polyacrylamide TBE gels (NuPAGE, 12 well, ThermoFisher) at 16.7%  
112 PEG400, but higher concentrations lead to fluorescence loss in the duplex, probably due to  
113 unfolding of the DNA duplex.

114

115 **Figure S6** Signal interference between IR800CW and IR680RD dyes. **A** The IR800CW and  
116 IR680RD dyes decrease in fluorescence when tethered to the same complex. An excess of  
117  $\alpha$ L5 and  $\alpha$ L3 were mixed with 50 fmol of an oligonucleotide bearing one copy each of the L5  
118 and L3 sequences, termed the staple oligonucleotide.  $\alpha$ L5 was paired with either labelled or  
119 unlabeled  $\alpha$ L3 to determine the effect of tethering  $\alpha$ L3 near  $\alpha$ L5, and the reciprocal case was  
120 applied to  $\alpha$ L3. Complexes were run on a TBE gel in TBEN buffer (0.5X TBE plus 50 mM  
121 NaCl) and transferred to a nylon membrane for quantification. **B** Labelled complexes always  
122 traveled higher on the gel (right panel). Each dye shifts ~6 nucleotides higher on a TBE gel.

123

124 **Figure S7** Performance of streptavidin elution methods. **A** L5 and L3 adapters were ligated  
125 together *in vitro*, run on a TBE-urea gel, gel extracted, purified using streptavidin beads  
126 (MyOne C1, ThermoFisher), and then eluted by the indicated method. This image shows an  
127 example of eluates dot blotted on nitrocellulose. Note the peculiar shape of formamide dots.  
128 No fluorescence is observed in buffer alone. Water+biotin elution used 100 nM biotin.  
129 Formamide elution was 95% formamide with 10 mM EDTA (as suggested by ThermoFisher,  
130 who state elution is >95% by this method). DNase elution used an excess of DNase I  
131 (Ambion) in the buffer supplied by the manufacturer. **B** Fluorescence quantification of the  
132 same linker-linker dimers depicted in panel A after each elution method. "TBE-urea gel"  
133 indicates fluorescence in the TBE-urea gel before extraction and streptavidin purification.  
134 Heating in water with 100  $\mu$ M biotin was effectively complete, as it yielded similar L5 (700  
135 nm) fluorescence as DNase elution, which is likely to be complete, and similar fluorescence  
136 overall as formamide elution, which is complete according to the manufacturer  
137 (ThermoFisher). **C** Water, formamide and TBE-urea gels all affect relative L5/L3  
138 fluorescence (IR680RD/IR800CW). The ratio of dye molecules is 1:1 in all cases, as all cases  
139 represent linker-linker dimers.

140

141 **Figure S8** Model-fitting and testing of an anti-sense oligonucleotide shift method of adapter  
142 concentration. **A** Fluorescence of the  $\alpha$ L5 oligonucleotide in the staple- $\alpha$ L5- $\alpha$ L3 complex as  
143 a function of staple oligonucleotide quantity. Signal fits to a linear model (solid line). **B**  
144 Fluorescence of the  $\alpha$ L3 oligonucleotide in the same complexes as A. Signal is again highly  
145 linear (solid line is a linear fit). **C** Known concentrations of L5 and L3 adapters and staple  
146 oligonucleotide were shifted by  $\alpha$ L5 and  $\alpha$ L3 and a fit to a linear model. As with staple  
147 oligonucleotides, data is linear: the solid line represents a perfect fit, dashed lines represent  
148 + or - 3 fmols. **D** Error in the estimates made in panel C. The method is reasonably accurate,  
149 with average errors around 20%. The parameters (slope and intercept) from panel C were  
150 then used to estimate oligonucleotide concentrations for ligation efficiency determinations,  
151 after applying a scaling factor based on the fluorescence of  $\alpha$ L5/  $\alpha$ L3 oligonucleotides in 50

152 fmol staple complexes. The calculation is described in [github.com/dfporter/easyCLIP/doc/](https://github.com/dfporter/easyCLIP/doc/) in  
153 the README\_fluorescence.md file.

154  
155 **Figure S9** Quantification of cross-link rates for endogenous hnRNP C by immunoblot shift.  
156 Cells were UV cross-linked cells then hnRNP C was immunopurified. The change in western  
157 blot signal corresponding to monomeric hnRNP C was compared between RNase  
158 concentrations (panels A-C). Because this change in signal is specifically for what can be  
159 collapsed with RNase to monomeric hnRNP C, not for the un-collapsible higher molecular  
160 weight complexes spread throughout the lane, it should agree with the cross-linking number  
161 derived from dividing the RNA quantified in the minimal region by the monomeric hnRNP C  
162 signal (Figure 4C) and be lower than that derived from all RNA across the gel. **A** RNase  
163 digestion series of immunopurified hnRNP C (immunoblot, anti-hnRNP C). **B** Example  
164 replicate of +/- RNase gels used to quantify the amount of shifted hnRNP C. **C** Quantification  
165 of the amount of shifted immunoblot signal comparing +/- RNase gel lanes, as in panel B.  
166 The change in western blot signal was ~20%, close to the 22% cross-link number from Figure  
167 4C. A more exact comparison was then performed, deriving the amount of hnRNP C protein  
168 dependent on both UV cross-linking and RNase-digestion by absolute quantification of a  
169 western blot (panels D-F). **D** Gel used for absolute quantification of UV- and RNase-  
170 depending monomeric hnRNP C signal. **E** Standards used for absolute quantification of gel  
171 data as in panel D. **F** Quantification of the absolute amount of protein present in the bands in  
172 replicates like that in panel D. **G** The amount of hnRNP C cross-linked to RNA that is  
173 collapsible into the monomeric hnRNP C band, as determined by the absolute quantification  
174 data in panel F. This method also gave a cross-link rate of ~20%, again similar to the 22%  
175 observed in Figure 4C. It was concluded that this method of determining cross-link rates  
176 using absolute quantification of RNA and protein (Figures 2 and 3) was reasonably accurate.  
177 This verification was only possible for hnRNP C because of its very high cross-link rate and  
178 small size.

179  
180  
181 **Figure S10 A** Purification of randomly selected HA-tagged non-RBPs. Red represents L5  
182 adapter fluorescence, and green anti-HA immunoblotting. **B** Total purified cross-linked RNA  
183 positively correlates with protein size for randomly selected non-RBPs. **C** Immunoblot and  
184 RNA visualization of the two non-RBPs that purified the most cross-linked RNA, UBA2 and  
185 EPB41L5, shows cross-linked bands running a little higher than the minimal region. **D** Read  
186 counts (per million reads) of the non-RBPs vs their own RNAs shows each non-RBP enriches  
187 for its respective RNA, a consequence of each non-RBP being expressed from a plasmid.  
188 This shows each library was generated from cells over-expressing the respective protein-of-  
189 interest, despite the fact that barcodes for multiple over-expression experiments were  
190 combined after each ligation. It also shows that if you express an RNA highly, it will show up  
191 in CLIP data, regardless of the purified protein. Counts were capped at 5,000 reads-per-  
192 million for visualization. Libraries for CAPNS6 were extremely small and were not included.  
193 **E** Distribution of reads between introns and exons in mRNA for randomly selected non-RBPs.

194  
195 **Figure S11** Expression levels of FH-PCBP1 and mutants in HCT116 cell lysate. The nature  
196 of the additional, higher molecular weight bands (b, c) is unknown.

197



198 **Figure S12** Microscopy of wild-type and mutant FHH-PCBP1 in HCT116 cells showing that  
199 L100P/Q mutants are less nuclear than wild-type or  $\Delta$ KH2 PCBP1. All images were taken  
200 with the same settings (exposure time, *ect.*), on the same slide and day.  
201

## 202 **Supplementary Methods**

### 203 *L5 linker labelling*

204 0.5 mg IRDye 680RD DBCO (LI-COR, 429 nmol) was resuspended in 42.9  $\mu$ L PBS for a  
205 concentration of 10 mM. The L5 linkers (Azide-DNA-RNA oligonucleotides) were ordered  
206 from IDT and resuspended in PBS. Oligonucleotides were run through a Zymo RNA-  
207 clean-and-concentrator kit (purification was required for labelling), using  $\sim$ 14  $\mu$ g  
208 oligonucleotide per column and eluting at  $\sim$ 1 mg/mL ( $\sim$ 85  $\mu$ M) in water. 5  $\mu$ L of 10 mM  
209 dye ( $\sim$ 50 nmol) was added to 10-150  $\mu$ g purified oligonucleotide ( $\sim$ 1-12 nmol) in PBS for  
210 a total volume of 200  $\mu$ L and reacted for 2 hours at 37°. Oligonucleotides were then run  
211 again through a Zymo clean-up kit and eluted in water. During column purifications,  
212 washes were performed using an 85% ethanol in water solution made fresh each time, in  
213 place of the kit's wash buffer. Concentrations were determined by A260 ratio using an  
214 approximate  $\epsilon=368,050$  M<sup>-1</sup>. Oligonucleotides were diluted to 10 nM in ligation buffer (50  
215 mM Tris pH 7.5, 10 mM MgCl<sub>2</sub>, 16.7% PEG400), 1  $\mu$ L was blotted onto a nylon  
216 membrane, and fluorescence was measured in an Odyssey CLx machine (LI-COR). This  
217 was typically  $\sim$ 15,000 fluorescence units per fmol for full labelling.

218

### 219 *AAVS1 microscopy of PCBP1 integrants*

220 4-well plastic chamber slides (Lab-Tek Permanox, Sigma #C6932-1PAK) were coated  
221 with 0.01% poly-L-lysine (Sigma #P4707) for 15 minutes, then washed twice with PBS,  
222 left dry for 5-30 minutes, and then either stored under PBS or used immediately. HCT116  
223 cells were plated at <20% confluency and grown at least 24 hours before staining. Cells  
224 were washed 1-2 times with PBS, then fixed for 10 minutes in 4% formaldehyde (in PBS)  
225 at room temperature, rinsed three times with PBS, and then permeabilized with PBS  
226 containing 0.5% Triton X-100 and 10% goat serum. After permeabilization, cells were  
227 stained for 1 hour at room temperature with the primary antibody at 1:200 dilution in PBS  
228 containing 0.05% Triton X-100 and 1% goat serum. After staining, cells were washed  
229 three times with PBS containing 0.05% Triton X-100, then 2-3 times in PBS without  
230 detergent, and the slide chamber removed. After letting the cells dry for a few minutes,  
231 one drop of DAPI mounting solution was added to each well and a coverslip was added  
232 and sealed with acetone.

233

### 234 *AAVS1 integration*

235  $\sim$ 2  $\mu$ g repair template and  $\sim$ 1  $\mu$ g Cas9/guide RNA plasmid were transfected using  
236 lipofectamine into 6-well plates containing  $\sim$ 300,000 cells each. Two days later,  
237 puromycin was added to 1  $\mu$ g/mL and selection continued for at least 10 total days. To  
238 determine expression levels, 10  $\mu$ g to 80  $\mu$ g of clarified lysate in 1-8  $\mu$ L of CLIP lysis buffer  
239 (typically 4  $\mu$ L) was combined with 16  $\mu$ L 1.6X LB (NuPAGE) and run on an SDS-PAGE  
240 gel. hnRNP C was immunoblotted using labelled anti-hnRNP C antibody (Santa Cruz,  
241 798-conjugated) at 3  $\mu$ L in 5-7 mL PBS blocking buffer (Licor), incubating for 30 minutes  
242 and washing with PBS for 20 minutes. To immunoblot for the HA tag,  $\sim$ 3  $\mu$ L Rabbit anti-  
243 HA (COVANACE) in 5-7 mL blocking buffer, followed by  $\sim$ 3  $\mu$ L IR680 or IR800 labeled  
244 Goat anti-Rabbit (Licor) in 5-7 ml were used.

245

### 246 *AAVS1 integrated FHH-tagged protein purification*

247 15  $\mu$ L anti-HA magnetic beads and 2-4 mg clarified lysate were used per  
248 immunopurification. Immunopurifications were carried out at 4° for 1 hour in 1 mL of CLIP  
249 lysis buffer.

250  
251

### 252 *GST-tagged protein constructs*

253 pGEX-6P-1 vector was digested with BamHI and CSRP2-FLAG-HA was cloned in using  
254 In-Fusion (Takara). Amplification primers for CSRP2-FLAG-HA were:  
255

|              |                                                |
|--------------|------------------------------------------------|
| Left primer  | GGGGCCCCTGGGATCCATG CCGAACTGGGGAG              |
| Right primer | GATGCGGCCGCTCGAGTCATGAACCTGCAGCATAGTCAGGCACATC |

256 The GST moiety (and protease site) is 231 amino acids (26.8 kDa), and CSRP2-FLAG-  
257 HA is 217 amino acids (23.2 kDa), for a 448 amino acid (50 kDa) construct. This resulting  
258 sequence is given below, with CSRP2-FLAG-HA underlined (\* denotes stop):  
259

260 MSPILGYWKIKGLVQPTRLLEYLEEKYEEHLYERDEGDKWRNKKFELGLEFPNLPYYI  
261 DGDVKL TQSM AII RYIADKHNMLGGCPKERA EISMLEGAVLDIRYGVSR IAYS KDFETLK  
262 VDFLSKLP EMLKMFEDRLCHKTYLNGDHVTHPDFMLYDALDVVLYMDPMCLDAFPKL  
263 VCFKKR IEAIPQIDKYLKSSKYIAWPLQG WQATFGGGDHP PKSDLEVL FQG PLG SMPN  
264 WGGGK KCGVCQKT VYFAEEVQCEGNSFHKSCFLCMVCKKNLDSTTVAVHGEEIYCK  
265 SCYGK KYGPKGYGYGQGAGTLSTDKGESLGIKHEEAPGHRPTTNP NASKFAQKIGGS  
266 ERCPRCSQAVYAAEKVIGAGKSWHKACFRCAKCGKGLESTTLADKDG EIYCKGCYAK  
267 NFGPKGF GFGQGAGALVHSELEDYKDDDDKAGYPYDVPDYAAGS\*

268

269 The GST-hnRNP C construct (54 kDa) was cloned into the same site but did not include  
270 HA or FLAG tags. The resulting sequence is below:  
271

272 MSPILGYWKIKGLVQPTRLLEYLEEKYEEHLYERDEGDKWRNKKFELGLEFPNLPYYI  
273 DGDVKL TQSM AII RYIADKHNMLGGCPKERA EISMLEGAVLDIRYGVSR IAYS KDFETLK  
274 VDFLSKLP EMLKMFEDRLCHKTYLNGDHVTHPDFMLYDALDVVLYMDPMCLDAFPKL  
275 VCFKKR IEAIPQIDKYLKSSKYIAWPLQG WQATFGGGDHP PKSDLEVL FQG PLG MAS  
276 NVTNKTDPRSMNSRVFIGNLNTLVVKKSDVEAIFSKYKIVGCSVHKGFAFVQYVNER  
277 NARAAVAGEDGRMIAGQVLDINLAAEPKVN RGKAGVKRSAAEMYGSVTEHPSPLL  
278 SSSFDLDYDFQRDYYDRMYSYPARVPPPPPIARAVVPSKRQRVSGNTSRRGKSGFNS  
279 KSGQRGSSSKGKLGDDLQAIKKELTQIKQKVD SLL ENLEKIEKEQSKQAVEMKNDKS  
280 EEEQSSSSVKKDET NVKMESEGGADDSAE EGDLLDDDDNEDRGDDQLELIKDDEKEA  
281 EEGEDDRDSANGEDDS\*

282

### 283 *GST-tagged protein purification*

284 *E. coli* BL21 cultures transformed with pGEX-6P-1 were grown in 500 mL at 37° until  
285 OD600 ~0.8, at which time Isopropyl-1-thio- $\beta$ -D-galactopyranoside (IPTG) was added to  
286 a final concentration of 0.5 mM, and cultures were grown for another ~1.5 h before  
287 harvesting. Cells were harvested by the method of S. Harper *et al.*<sup>2</sup>, namely centrifuging  
288 at 4,000 rcf for 20 min at 4°, resuspending in ~50 mL LB, and centrifuging again at 4,000

289 rcf for 20 min at 4°. Cell pellets were frozen in dry ice until purification. When thawed, the  
290 cell pellet was resuspended in 20 mL of lysis buffer (50 mM Tris, 10 mM  $\beta$ -  
291 mercaptoethanol, 50 mM NaCl, 5 mM EDTA, 1% Triton X-100, Roche protease inhibitor,  
292 5% glycerol). Lysozyme was added very approximately to ~1 mg/ml, froze the pellet again  
293 in dry ice, thawed in a water bath, and lysed by sonication. The lysate was clarified by  
294 centrifugation at ~21,000 rcf, 4°, for 15 min. 4 mL of 50% glutathione-agarose (Pierce)  
295 was washed with resin wash buffer (Dulbecco PBS with 10 mM  $\beta$ -mercaptoethanol), and  
296 then incubated at 4° in a 50 mL Falcon tube with clarified lysate for ~30 min before loading  
297 on a column. The column was washed with 50 mL of 4° wash buffer (Dulbecco PBS with  
298 10 mM  $\beta$ -mercaptoethanol, 5% glycerol and Roche protease inhibitor). Samples were  
299 eluted in batch with three incubations at 4° with 1.5-2 mL elution buffer (100 mM Tris pH  
300 8.0, 150 mM NaCl, 10 mM  $\beta$ -mercaptoethanol, 5% glycerol, 10 mM glutathione).

301

### 302 *GST-tagged protein quantification*

303 Following the method of K. Janes<sup>3</sup>, BSA standards were run on a gel at 10, 5, 2.5, 1.3,  
304 0.6, 0.3, and 0.15  $\mu$ g, along with purified protein. Following the method of S. Luo *et al.*<sup>4</sup>,  
305 gels were washed for 10 minutes in water, stained for 10 minutes with staining buffer  
306 (50% methanol, 10% acetic acid, 0.02% Coomassie R250) at room temperature, followed  
307 by destaining for 10 minutes with destaining buffer (40% methanol, 7% acetic acid), and  
308 washing twice for 10 minutes with water. A third wash was performed overnight. Protein  
309 was then visualized by scanning the 700 nm channel on a Licor Odyssey scanner. A  
310 hyperbolic curve of band fluorescence vs input protein weight was fit to BSA standards.  
311 Specifically, the parameters 'a' and 'b' in the equation  $y = a*x/(b+x)$ , where 'x' is protein  
312 weight and 'y' is fluorescence, were fit using least-squares regression. This curve was  
313 used to determine the concentration of purified protein.

314

### 315 *Western blot protein quantification*

316 Following the method of K. Janes<sup>3</sup>, purified GST-tagged protein standards were run  
317 alongside the samples to be quantified. Purified GST-hnRNPC2 and purchased FBL  
318 (Prospec, cat. enz-566) were diluted in protein dilution buffer (0.5X PBS, 0-5% glycerol,  
319 0.05% Tween-20, 0.2 mg/mL BSA) to 20 ng/ $\mu$ L. Two-fold dilutions down from 20-100  
320 ng/ $\mu$ L were made for a total of 8 concentrations; this solution was then delivered as 14  
321  $\mu$ L aliquots to multiple striptube aliquots and frozen at -80°. When running gels, 10  $\mu$ L  
322 from each concentration were combined with 10  $\mu$ L loading buffer (3.6X NuPAGE loading  
323 buffer with 10%  $\beta$ -mercaptoethanol), heated at 75° for 15 minutes, and loaded on a 4-  
324 12% NuPAGE gel. Standards were therefore present at ~1000-3 ng per lane.  
325 Immunoblotting against the HA epitope was performed with 1:3000  $\alpha$ HA conjugated to  
326 Alexa Fluor 488 and incubating for 1 hour at room temperature in PBS blocking buffer (LI-  
327 COR); images were taken in a GE Typhoon scanner (532 nm laser, 526SP filter, 500  
328 PMT, 200  $\mu$ m resolution). When small aliquots of immunopurification beads were loaded  
329 on a gel, BSA was first added to 0.2 mg/mL to prevent absorption.

330

### 331 *BCA*

332 For BSA standards, 105  $\mu$ L PBS was combined with 20  $\mu$ L BSA (2 mg/mL stock) and 3  
333  $\mu$ L lysis buffer for the highest concentration of BSA, and 115  $\mu$ L PBS, 10  $\mu$ L BSA, and 3  
334  $\mu$ L lysis buffer for the second highest concentration. For lysate samples, 3  $\mu$ L lysate was

335 combined with 125  $\mu$ L PBS. For both standards and samples, serial dilutions were made  
336 by a factor of three into PBS with 0.024% lysis buffer. Duplicate wells were used for each  
337 sample. 25  $\mu$ L of each well was transferred to a second 96-well plate and combined with  
338 200  $\mu$ L working reagent (Pierce BCA kit, 50:1 A:B). Plate was incubated for 20-30 minutes  
339 at 37°. Absorbance was measured at 562 nm.

340

341 *Creation of cross-linked hnRNP C standard.*

342 Four replicates of 906-1600  $\mu$ g of HCT116 lysate from cross-linked cells was added to  
343 ~20  $\mu$ L Protein G Dynabeads (ThermoFisher Cat #10003D) coupled with 25  $\mu$ L (5  $\mu$ g)  
344 anti-hnRNP C (4F4) antibody per replicate. Immunoprecipitation was carried out at 4° for  
345 ~1 hour, followed by the standard easyCLIP protocol for cross-link rate determination.  
346 The RNase digestion was performed with half of the samples treated with 0.1 U/ $\mu$ L  
347 RNase ONE for 10 minutes, and the other half of the samples treated with 0.05 U/ $\mu$ L  
348 RNase ONE for ~5 minutes. The PNK reaction was 14 minutes at 37°. The ligation was  
349 performed overnight (17 hours) with 20 pmol L5 (barcode 23), and 2  $\mu$ L high concentration  
350 T4 RNA ligase (NEB). Samples were combined, and ~20 aliquots comprising 2.5% of the  
351 beads (~10 ng hnRNP C each, ~400 ng total purified) in ~15  $\mu$ L 1.6X NuPAGE buffer  
352 were frozen in dry ice and kept long term at -80°. Immunoblotting was performed with  
353 ~1:3000  $\alpha$ hnRNP C conjugated to AF790 (Santa Cruz Biotechnology, sc-32308 AF790),  
354 which is visible on the 800 nm channel in a LI-COR Odyssey scanner, in PBS blocking  
355 buffer (LI-COR) for ~1 hour at room temperature.

356

357 *Sequencing library creation: hnRNP C and FBL.*

358 HEK293T cells were grown to 30-90% confluency in petri dishes in DMEM with 10% Fetal  
359 Bovine Serum, media was removed by vacuum, cells were washed with 4° PBS, and UV  
360 cross-linked (254 nm) in 10 cm or 15 cm plates in a Stratalinker at 0.3 J/cm<sup>2</sup>. After cross-  
361 linking, 1 mL 4° lysis buffer (15 cm plates) or 0.5 mL lysis buffer (10 cm plates) was added  
362 to each plate, cells were harvested with a rubber spatula and frozen in dry ice. CLIP lysis  
363 buffer was as in Zarnegar *et al.*<sup>5</sup>, except the concentration of Triton X-100 was 1% (see  
364 File S1 for all buffers used for CLIP). For each hnRNP C replicate, 4  $\mu$ g hnRNP C1/C2  
365 Antibody (4F4, Santa Cruz Biochnology #sc-32308) and 20  $\mu$ L Dynabeads Protein G for  
366 Immunoprecipitation (ThermoFisher, #10003D) were coupled for 1 hour at room  
367 temperature before adding 600  $\mu$ g of clarified HEK293T lysate and immunopurifying at 4°  
368 for 45-60 minutes. For FBF, two replicates of 4 mg clarified lysate were combined with 20  
369  $\mu$ L Fibrillar Antibody (Bethyl, #A303-891A) and 20  $\mu$ L Protein G Dynabeads;  
370 immunopurification was at 4° for 1 hour. The easyCLIP assay was performed as  
371 described in File S1.

372

373 *easyCLIP: library creation.*

374 The full easyCLIP protocol and all buffers are described in File S1. After harvesting, cells  
375 were thawed and lyzed with a microtip sonicator six times for five seconds each (10%  
376 power), with samples cooled by placement in dry ice between sonications. Lysates were  
377 then clarified by spinning at 14 krcf for 10 minutes at 4° and transferring the supernatant  
378 to a new tube. Concentrations were determined by BCA (see BCA section). To visualize  
379 protein expression levels, 15  $\mu$ g of clarified lysates were used for western blotting. For  
380 immunopurification, typically 20  $\mu$ L of anti-HA beads per sample were washed with NT2

381 buffer, then CLIP lysis buffer. Samples were diluted to 1-4 mg/mL during  
382 immunopurification, typically ~2 mg/ml. Immunopurification was 40 minutes to 1 hour at  
383 4°. Samples were then washed once with H. Str. Buffer (10 minutes), H. Salt buffer (10  
384 minutes), low salt buffer, and finally NT2 buffer, each with 1 mL. Samples were then  
385 stepped down with another wash to ~200  $\mu$ L NT2 buffer. RNase digestion was performed  
386 by diluting 2  $\mu$ L 100 U/ $\mu$ L RNase ONE to 1 U/ $\mu$ L in NT2 buffer, then diluting this to 0.025  
387 U/ $\mu$ L in NT2 buffer with 16% PEG and adding 60  $\mu$ L of this to each sample. The digestion  
388 was performed for 8-12 minutes at 30° with intermittent shaking. The digestion mixture  
389 was removed from the beads and 1 mL H. Str. Buffer was added. Samples were then  
390 washed twice with 1 mL NT2 buffer before being stepped down to ~200  $\mu$ L NT2 buffer.  
391 Samples were then processed in the order (1) kinase, (2) 5' ligation, (3) L5 barcodes  
392 combined, (4) phosphatase, (5) 3' ligation, or in the order (1) phosphatase, (2) 3' ligation,  
393 (3) L3 barcodes combined, (4) kinase, (5) 5' ligation. Processing details and  
394 oligonucleotide sequences are in File S1. In either case, all samples were typically  
395 combined before being loaded into a single lane of a 4-12% NuPAGE Bis-Tris gel, run at  
396 200V for ~45 minutes, and transferred to nitrocellulose at 400-500 mA for ~25 minutes.  
397 Membranes were then placed in PBS and immediately imaged in an Odyssey CLx  
398 machine. Membranes were cut using scalpels and put in 375  $\mu$ L PK buffer with 25  $\mu$ L  
399 Proteinase K and incubated for 40-60 minutes with shaking at 45-55°. In some cases, 2  
400  $\mu$ L of extracted RNA was then spotted on nylon and imaged. PK mixtures were added  
401 directly to 20  $\mu$ L oligonucleotide(dT) beads and mixed at room temperature for 20  
402 minutes. Alternatively, 2 M KCl was added and SDS was spun out, then 20  $\mu$ L  
403 oligonucleotide(dT) beads were added and the samples were mixed at 4° for 20 minutes.  
404 Beads were washed once with biotin IP buffer, once with NT2 buffer, transferred to a PCR  
405 tube, then washed 3-4 times with PBS buffer. Samples were eluted in 14.4 water with 15  
406 pmol reverse transcription primer by heating at 95° for 3 minutes and transferring to a  
407 new tube. Reverse transcription was performed by incubating for 40 minutes at 53° and  
408 10 minutes at 55°, or in some cases for 40 minutes at 53° only. Reverse transcription  
409 product was then used directly for PCR as described in File S1.

410

#### 411 *Ligation efficiency test by protein shift.*

412 The ligation efficiency test with hnRNP C was performed in three replicates. hnRNP C  
413 was purified by incubating 600  $\mu$ g of clarified HEK293T lysate with 4  $\mu$ g anti-hnRNP  
414 C1/C2 antibody for 1.5 hours at 4° as described previously<sup>5</sup>. Beads were RNase digested  
415 and dephosphorylated as described previously, before being split 2:1. The split  
416 corresponding to 200  $\mu$ g lysate was PNK phosphorylated and 5' ligated as described in  
417 the easyCLIP protocol. The split corresponding to 400  $\mu$ g was 3' ligated as described  
418 previously, before being split in half. One 3' ligated split was PNK phosphorylated and 5'  
419 ligated as described in the easyCLIP protocol. All samples were then run on a 4-12%  
420 SDS-PAGE gel (NuPAGE), transferred to nitrocellulose and visualized as described  
421 previously. The amount of RNA that was neither 5' nor 3' ligated was determined by the  
422 following reasoning. First, let P5 be the probability of a 5' ligation, and P3 be the  
423 probability of a 3' ligation. Let a = RNA with no ligation; b = RNA with a 3' ligation only; c

424 = RNA with a 5' ligation only; and d = RNA with a 5' and 3' ligation. Let T = the total  
425 amount of RNA. It follows that:

$$426 \quad b * c = (T * P3(1 - P5)) * (T * P5(1 - P3))$$

$$427 \quad a * d = (T * (1 - P5)(1 - P3)) * (T * P5P3)$$

428 Rearranging terms shows that  $a*d = b*c$ . Since d, b, and c are determined by direct  
429 visualization of fluorescence, it follows that the RNA with no ligation (a) is also known.

430

#### 431 *Fluorescence loss*

432 20  $\mu$ L of Streptavidin Dynabeads (ThermoFisher) per purification were washed three  
433 times with BIB, then combined with 2  $\mu$ L of 5  $\mu$ M biotin-anti-L5 RNA (10 pmol, ordered as  
434 /5BiosG/rUrArCrCrCrUrUrCrGrCrUrUrCrArCrArCrArCrArCrArCrArG from IDT, with an  
435 RNase free HPLC purification). The oligonucleotide was captured for 20 minutes in 1 mL  
436 BIB, then washed with BIB, NT2, PBS (1X each) and resuspended in 50  $\mu$ L BIB.

437

438 6.4  $\mu$ L 2 M KCl was added to proteinase K-digested samples, and SDS was precipitated  
439 on ice for 15 minutes. SDS was spun out at 13 kRPM for 10 minutes. Dynabeads with 10  
440 pmol biotin-anti-L5 RNA oligonucleotide in 50  $\mu$ L BIB were then added to PK reactions  
441 and diluted to a total volume of 1 mL with BIB. The purification was carried out at 4° for  
442 20 minutes. Beads were washed three times with BIB, twice with PBS, and eluted for 2  
443 minutes at 95° in 15-20  $\mu$ L water with 100 nM biotin.

444

445 10X NT2 was added to 1X final concentration, and PEG to 16% final concentration. 1  $\mu$ L  
446 100 U/ $\mu$ L RNase ONE was added and samples incubated for 40 minutes at 37°. RNase  
447 ONE was inactivated by adding 10% SDS to 0.1%. Shift buffer was added to 1X (25 mM  
448 Tris pH 7.5, 10 mM MgCl<sub>2</sub>, and 16% PEG400). 300-400 fmol labelled antisense oligos  
449 were added and samples were processed further as described for the ligation efficiency  
450 test by anti-sense oligo shift.

451

452 Shift oligos:

|             |                                       |       |
|-------------|---------------------------------------|-------|
| $\alpha$ L5 | /5AzideN/TACCCTTCGCTTCACACACACAAG     | 24 nt |
| $\alpha$ L3 | /5AzideN/TTTTTCTGAACCGCTCTTCCGATCTCAG | 28 nt |

453

454 300-400 fmol labelled antisense oligonucleotides were added (max is ~500 fmol before  
455 signal cannot be quantified). The relative amount of shift oligonucleotide to input is  
456 important, as excessive oligonucleotide will create artifacts. Heat at 75° for 2 minutes,  
457 then let sample sit at room temperature for at least a minute. Create samples for two  
458 lanes of shift oligonucleotides at 300 fmol per lane (or however much was used to shift).  
459 Running the shift oligonucleotides at the same concentration used to shift is required to  
460 subtract background. Add 6X Ficoll/BPB buffer (15% Ficoll 400, 0.03% Bromophenol  
461 blue, 50 mM Tris pH 7.5) to 1X, but do not heat. For gel running buffer, add NaCl to 25  
462 mM in 4° 0.5X TBE buffer. Samples were loaded on a 20% TBE gel and run gel 180V at  
463 4° for one hour, replacing running buffer with 4° buffer every ~40 minutes. Finally,  
464 samples were transferred to nylon in 0.5X TBE buffer at 250 mA for 30 minutes.

465

466 *Ligation efficiency test by RNA shift.*

467 Samples of hnRNP C were prepared as normal for easyCLIP (File S1), and as described  
468 for the protein shift ligation efficiency test, up to the proteinase K extraction from  
469 nitrocellulose. To inactivate proteinase K, 6.4  $\mu$ L 2M KCl per 400  $\mu$ L of proteinase K  
470 extract was added, samples incubated at 4° for 15 minutes, and precipitated SDS  
471 removed by centrifugation at 13,000 RPM for 10 minutes at 4°.

472  
473 Two sets of MyOne C1 Streptavidin beads were prepared, each using 13-20  $\mu$ L MyOne  
474 C1 streptavidin beads per sample: one set for biotin purification and one for antisense  
475 oligonucleotide purification. Beads were washed three times with Biotin IP Buffer (BIB:  
476 100 mM Tris pH 7.5, 1 M NaCl, 0.1% Tween-20, 1 mM EDTA). Those to be used for the  
477 biotin purification were then set aside until use. The set for anti-sense oligonucleotide  
478 purification were then incubated with 30 pmol anti-sense biotinylated oligonucleotide per  
479  $\mu$ L resin in 1 mL BIB and rotated for 20 minutes at room temperature. Solution was  
480 removed and a second incubation with 15 pmol biotinylated oligonucleotide per  $\mu$ L resin  
481 was performed to ensure saturation. After incubation, anti-sense oligonucleotide beads  
482 were washed with BIB, NT2, PBS, and resuspended in 750  $\mu$ L BIB. 50  $\mu$ L of this bead  
483 solution was added to 400  $\mu$ L BIB containing 20 nmol biotin and mixed. This solution was  
484 allowed to sit at room temperature for at least 5 minutes.

485  
486 Proteinase K extract was bound to beads and incubated for 20 minutes at 4°. Supernatant  
487 was removed and beads were resuspended in 200  $\mu$ L BIB, transferred to a PCR tube,  
488 rinsed with 200  $\mu$ L NT2, washed with 200  $\mu$ L PBS, and allowed to at least briefly reach  
489 20-25°. After reaching room temperature, supernatant was removed and libraries eluted  
490 in 18  $\mu$ L formamide at 65° for 2 minutes.

491  
492 *Ligation efficiency test by anti-sense oligonucleotide shift.*

493 Beads were washed three times with BIB, twice with PBS, and eluted for 2 minutes at 95°  
494 in 15-20  $\mu$ L water with 100 nM biotin. Add 10X NT2 to 1X, and PEG to 16% final  
495 concentration. Add 1  $\mu$ L 100 U/ $\mu$ L RNase ONE. Incubate 40 minutes at 37°. Add 10%  
496 SDS to 0.1% to inactivate RNase ONE. Add shift buffer to 1X (25 mM Tris pH 7.5, 10 mM  
497 MgCl<sub>2</sub>, and 16% PEG400). Split the volume in three or four if doing separate shifts.

498  
499 300-400 fmol labelled antisense oligos were added (max is 500 fmol before signal cannot  
500 be quantified). The relative amount of shift oligo to input is important, as excessive oligo  
501 will create artifacts. Samples were heated to 75° for 2 minutes, then cooled to room  
502 temperature at -0.1°/s. 6X Ficoll/BPB buffer (15% Ficoll 400, 0.03% Bromophenol blue,  
503 50 mM Tris pH 7.5) was added to 1X before loading on a gel. For gel running buffer, NaCl  
504 to was added to 25 mM in 4° 0.5X TBE buffer. Samples were loaded on a 20% TBE gel  
505 and run at 180V at 4° for ~1-3 hours, replacing running buffer with 4° buffer every ~40  
506 minutes. Finally, samples were transferred to nylon in 0.5X TBE buffer at 250 mA for 30  
507 minutes.

508  
509 *Generation of linear cDNA standards*

510 Separately barcoded linear P3 and P6 fragments were ordered from IDT and stitched  
511 together by oligo extension. P3 fragments were of the following form, with X indicating the



512 P3 barcode (Sequences in File 1). Fragments were mixed together in water and placed  
513 at room temperature before running the stitching reaction. Fragments were stitched  
514 together using Klenow fragment: 1  $\mu$ L 100  $\mu$ M of each oligo was combined with 10  $\mu$ L  
515 NEBuffer 3.1 (10X), 1.5  $\mu$ L of 2 mM dNTPs and 1  $\mu$ L Klenow Fragment (exo-), in 100  $\mu$ L  
516 reaction volumes. Reactions were incubated at 37° for 1 hour. 2  $\mu$ L of Exonuclease I  
517 (NEB) was added to each reaction and incubated at 37° for 1 hour. Samples were purified  
518 with RNA clean and concentrator columns (Zymo) and eluted in 40  $\mu$ L. Concentrations  
519 were determined by the dsDNA Qbit assay, and 1  $\mu$ L of each sample was run on a 15%  
520 TBE-urea gel (NuPAGE). The dsDNA concentration obtained by Qbit was converted to a  
521 molar quantity using a molecular weight and fluorescence per fmol was determined by  
522 comparing the Qbit assay results and fluorescence on a TBE-urea gel. 3 fmol/ $\mu$ L samples  
523 were run again on a gel to determine concentration, diluted to 80 amol/ $\mu$ L, adjusted based  
524 on in-gel fluorescence, and finally diluted to 8 amol/ $\mu$ L. 0.3  $\mu$ L of 8 amol/ $\mu$ L standards (2.4  
525 amol) were added to CLIP PCR reactions. Consistency in final molar concentrations was  
526 evaluated by qPCR and adjusted towards the average.

527

#### 528 *CLIP analysis: genomes*

529 The GRCh38 genome Gencode release 29 and features were obtained from:

530 [ftp://ftp.ebi.ac.uk/pub/databases/gencode/Gencode\\_human/release\\_29/GRCh38.primary\\_assembly.genome.fa.gz](ftp://ftp.ebi.ac.uk/pub/databases/gencode/Gencode_human/release_29/GRCh38.primary_assembly.genome.fa.gz)

531  
532 [ftp://ftp.ebi.ac.uk/pub/databases/gencode/Gencode\\_human/gencode.v29.primary\\_assembly\\_annotation.gtf.gz](ftp://ftp.ebi.ac.uk/pub/databases/gencode/Gencode_human/gencode.v29.primary_assembly.annotation.gtf.gz).

533  
534 The STAR index was built using --sjdbOverhang 75. When assigning reads to genes after  
535 STAR mapping, only GTF features with transcript support level ts1 or ts1A were  
536 included.

537

538 For repetitive elements, an alignment file from was downloaded from  
539 <http://www.repeatmasker.org/>. This was parsed to extract representatives, which were  
540 placed in an artificial chromosome separated by poly(N), and a gtf file for each  
541 representative was generated. A STAR index was built with --genomeSAindexNbases 5.  
542 The parameter genomeSAindexNbases must be set well below the default of 14 or  
543 building will be very slow. When mapping to the repeats chromosome, --alignIntronMax  
544 1 was used to prevent the insertion of introns by STAR.

545

#### 546 *CLIP analysis: read processing*

547 Custom Python scripts ([github.com/dfporter/easyCLIP](https://github.com/dfporter/easyCLIP)) were used for all analysis. Raw  
548 fastq files were split by L5 and L3 barcodes allowing one nucleotide mismatches to the  
549 expected barcodes. Reads were first mapped to a custom-built chromosome of repetitive  
550 elements using STAR and "--alignEndsType EndToEnd". Unmapped reads from this  
551 stage were then mapped to the regular genome using default parameters. Reads  
552 mapping the genome to remove multimapping reads and MAPQ < 10 reads. Mapping  
553 results from repetitive elements and the genome were combined, read mates removed,  
554 results converted to BED format, and PCR duplicates removed using the random  
555 hexamer UMI on the L5 adapter.

556

557 *CLIP analysis: read assignment*

558 Reads were assigned to an RNA if they overlapped only that RNA, or if they overlapped  
559 a snoRNA element in any case. The strand was ignored for repetitive elements.

560

561 *CLIP analysis: statistics*

562 Inputs to statistical analysis were either reads per million or reads per ten billion proteins,  
563 both treated the same. To speed up analysis, RNAs with a maximum count below five  
564 (reads per million reads, or per ten billion proteins) across all samples were dropped from  
565 all further analysis. For the randomly selected non-RBPs constituting background, if a  
566 replicate had no reads it was assigned one tenth the minimum positive count present in  
567 that dataset (i.e., if a dataset had one million reads, zeros were replaced with 0.1 reads  
568 per million). The average count across replicates for each protein was determined,  
569 resulting in a sample of eight values taken from the null distribution (one for each of the  
570 proteins CDK4, CHMP3, DCTN6, ETS2, IDE, ITPA, TPGS2 and UBA2).  $\sigma^2/\mu$  was  
571 essentially always above 2 for these samples, and were fit to a negative binomial using  
572 `scipy`<sup>6</sup> and calculated P values accordingly before finally adjusting all P values for each  
573 protein by the Benjamini-Hochberg method into FDR equivalents.

574

575 *CLIP analysis: peak finding*

576 For each RNA, reads spanning the genomic locus were converted into an array with the  
577 length of the genomic locus and each value representing the count of 5' read ends  
578 mapping to that position. The values were smoothed by convolution using a box with  
579 length 50 for loci of at least 2,000 nucleotides, length 20 for 20-2,000 nucleotides, and  
580 length 10 for <200 nucleotides. If this array had a single maximum, it was taken to be the  
581 peak location. If there were multiple maxima (equal heights) and no maxima had more  
582 than a two nucleotide gap from another maxima, the peak was taken as the average  
583 position between the first and last maxima. If any maximum was more than two  
584 nucleotides from another maximum, the RNA was considered to have no peak.

585

586

587 **Supplementary references**

- 588 1. Van Nostrand, E. L. *et al.* Robust transcriptome-wide discovery of RNA-binding  
589 protein binding sites with enhanced CLIP (eCLIP). *Nat. Methods* **13**, 508 (2016).  
590 2. Harper, S. & Speicher, D. W. Purification of proteins fused to glutathione S-  
591 transferase. *Methods Mol. Biol.* **681**, 259–280 (2011).  
592 3. Janes, K. A. An analysis of critical factors for quantitative immunoblotting. *Sci.*  
593 *Signal.* **8**, rs2 LP-rs2 (2015).  
594 4. Luo, S., Wehr, N. B. & Levine, R. L. Quantitation of protein on gels and blots by  
595 infrared fluorescence of Coomassie blue and Fast Green. *Anal. Biochem.* **350**,  
596 233–238 (2006).  
597 5. Zarnegar, B. J. *et al.* irCLIP platform for efficient characterization of protein—RNA  
598 interactions. *Nat. Methods* **13**, 489–492 (2016).  
599 6. Oliphant, T. E. Python for Scientific Computing. *Comput. Sci. Eng.* **9**, 10–20  
600 (2007).  
601

A

Fig S1

| Method   | Fraction of RT input to PCR | PCR cycles | fmols ( $\sigma$ ) | fmols, extrapolated to 100% input to PCR ( $\sigma$ ) | Fold increase | Fraction mappable      | Minimum fold increase in mappable reads | Stated input library size, stated PCR efficiency | Input library size at 86% PCR efficiency | Input library size at 96% PCR efficiency |
|----------|-----------------------------|------------|--------------------|-------------------------------------------------------|---------------|------------------------|-----------------------------------------|--------------------------------------------------|------------------------------------------|------------------------------------------|
| easyCLIP | 16%                         | 16         | 1,971 (241)        | 12,800 (1,445)                                        | 178           | 16%                    | 30                                      | NA                                               | 1,30,000,000 (2,100 amol)                | 226,000,000 (370 amol)                   |
| eCLIP    | 100%                        | 16         | 72 (8)             | 72 (8)                                                | 1             | Unknown, gel extracted | 1                                       | 7,000,000 (12 amol), 86%                         | 7,000,000 (12 amol)                      | NA                                       |

B

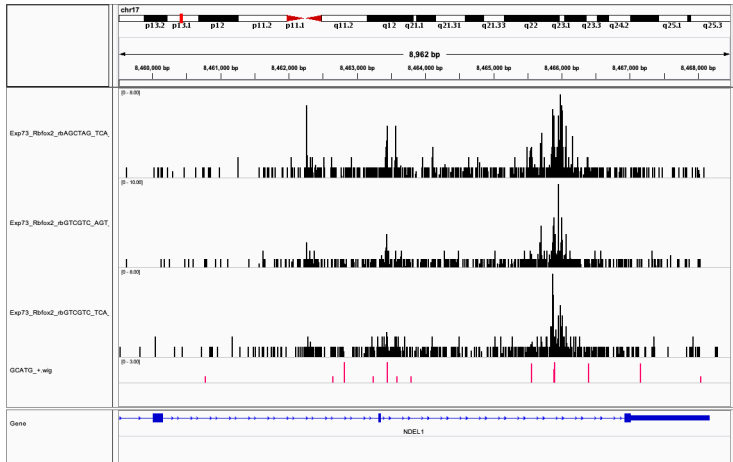

C

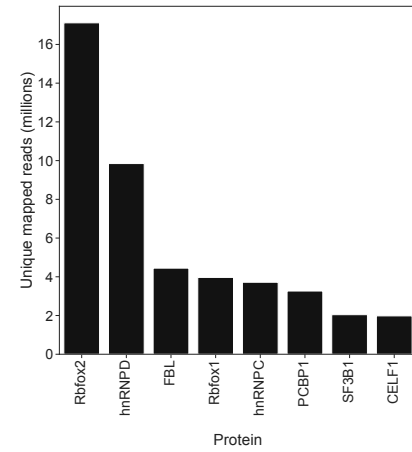

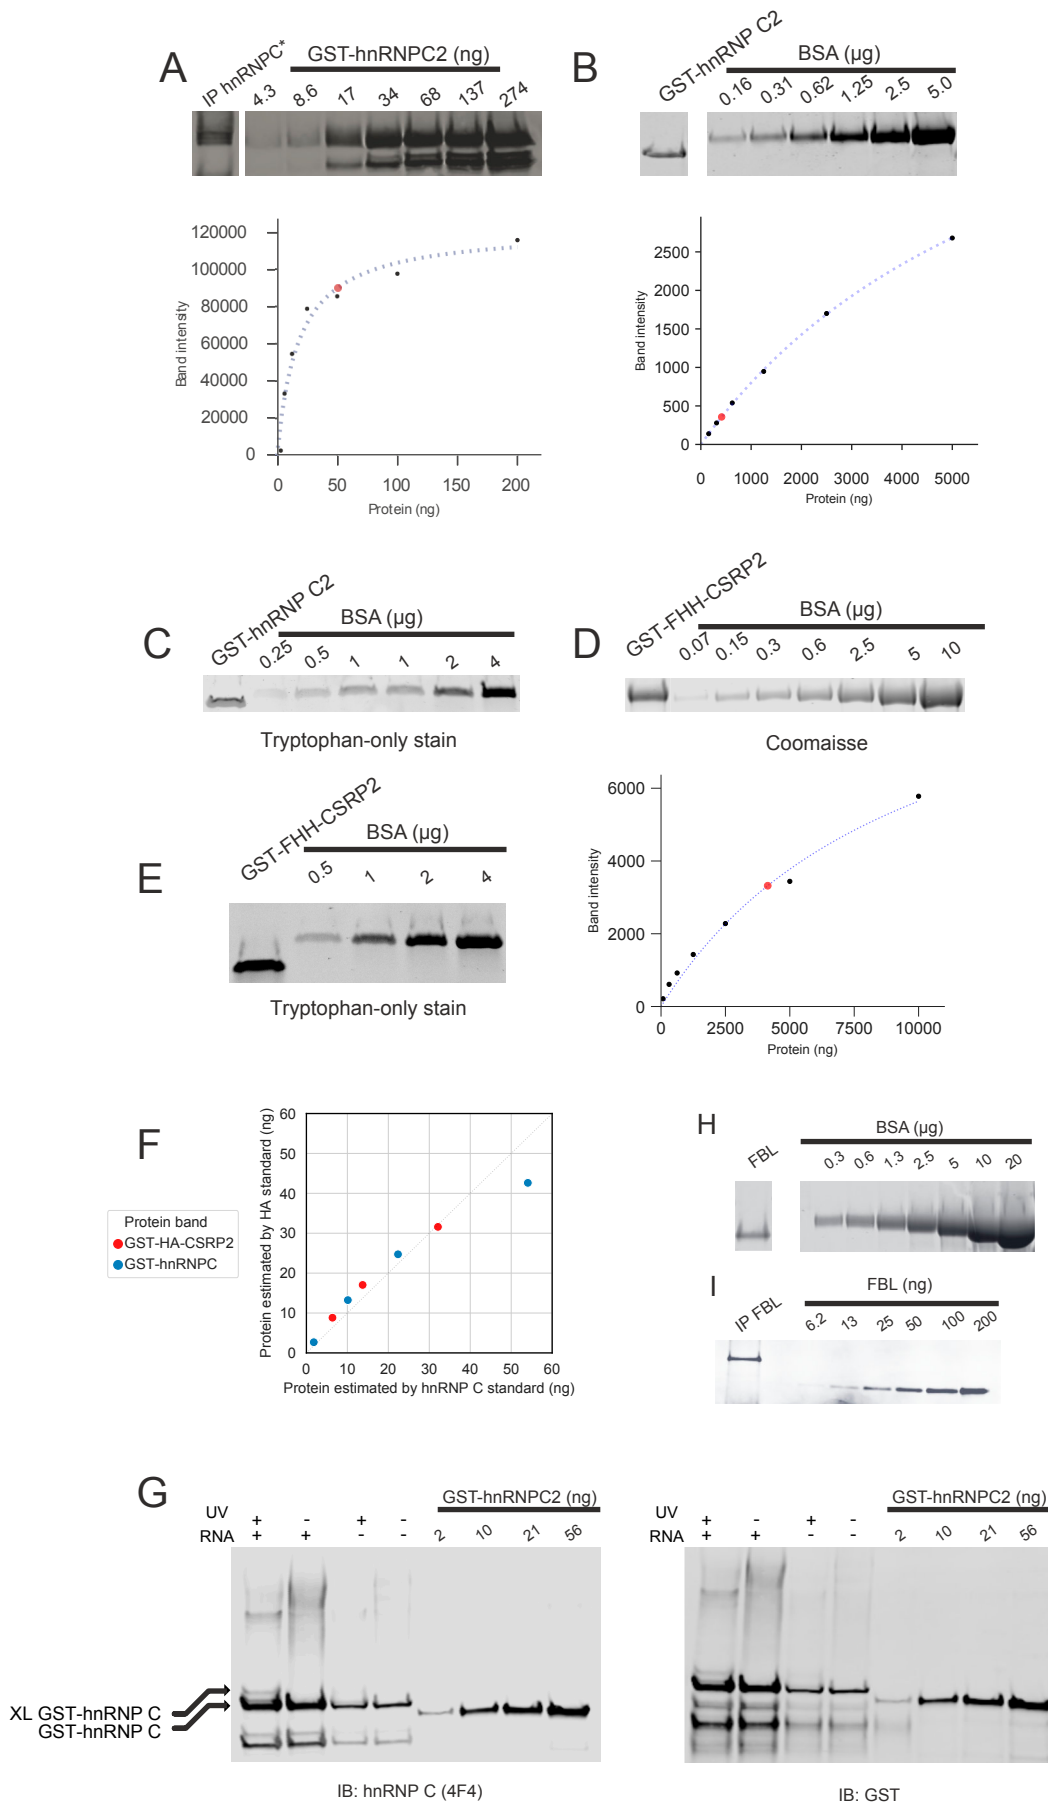

Fig S2

Fig S3

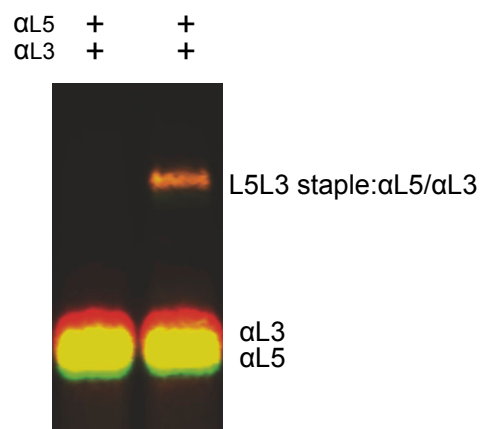

Fig S4

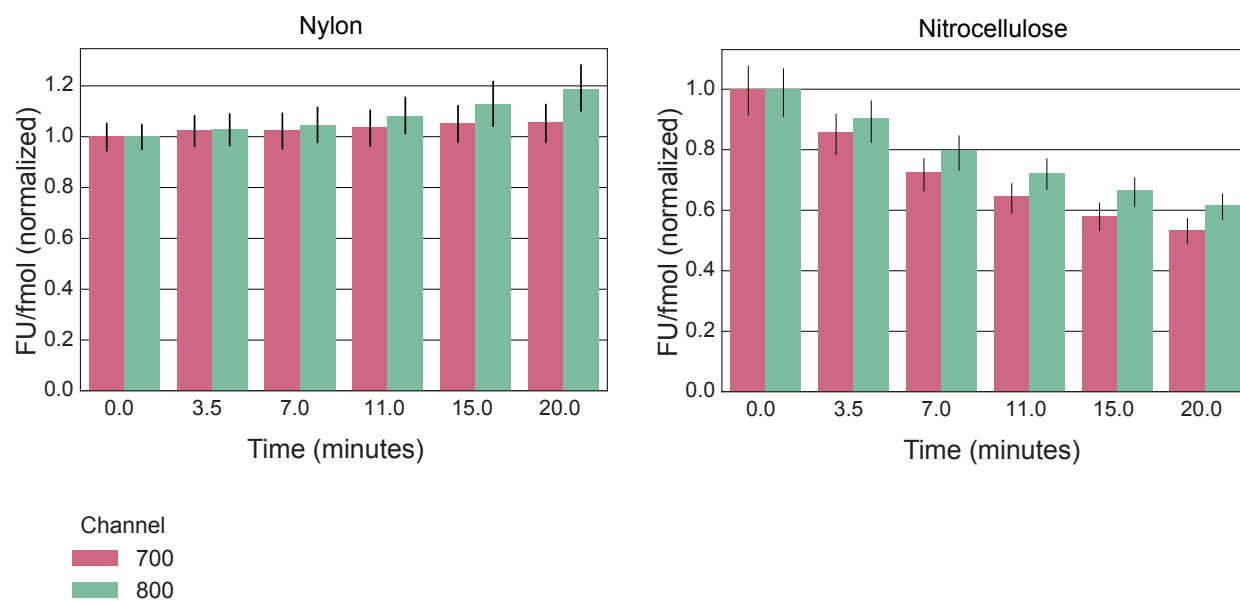

Fig S5

A

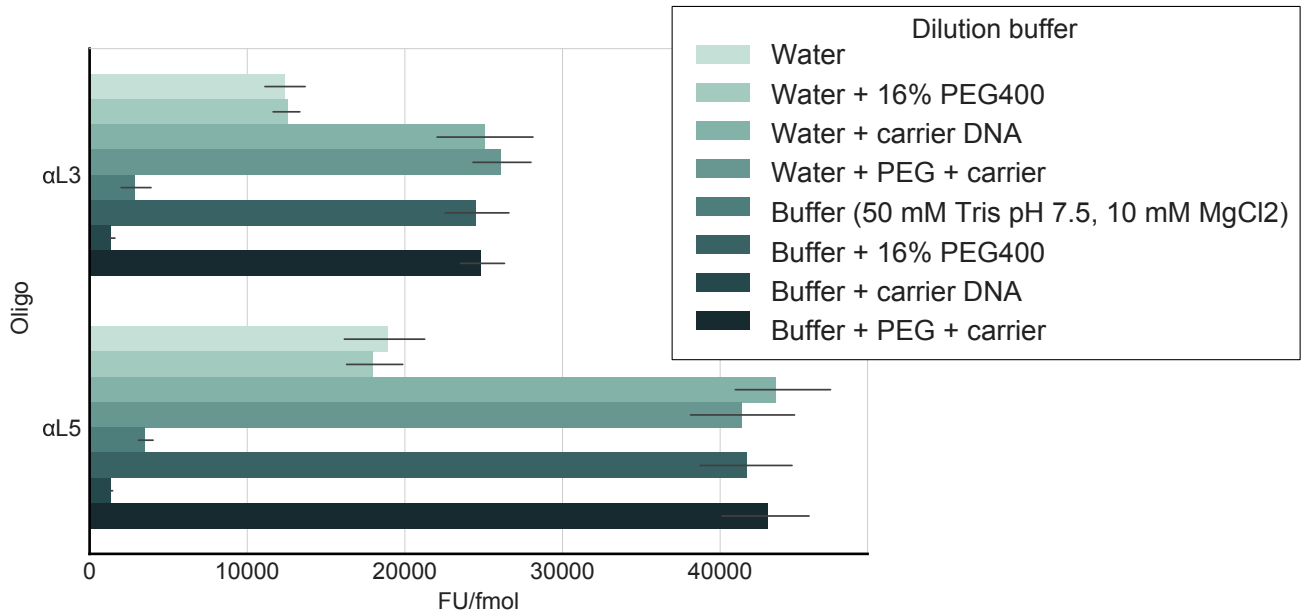

B

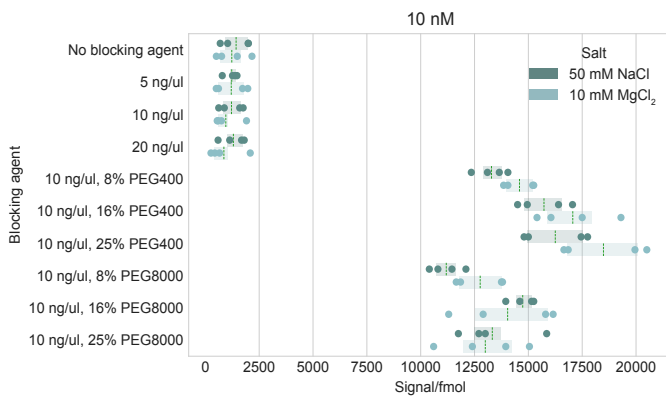

C

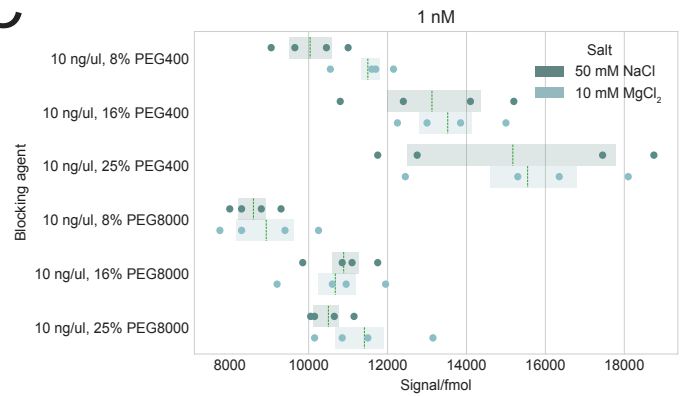

D

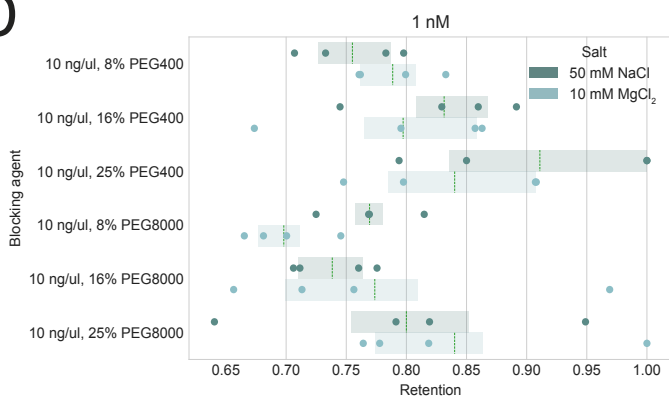

E

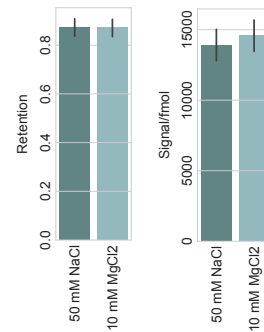

F

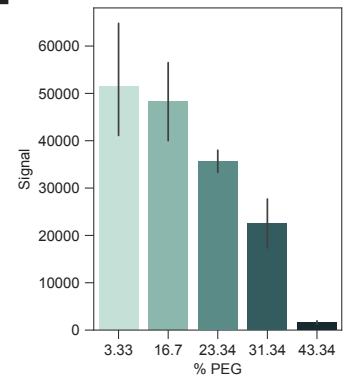



Fig S6

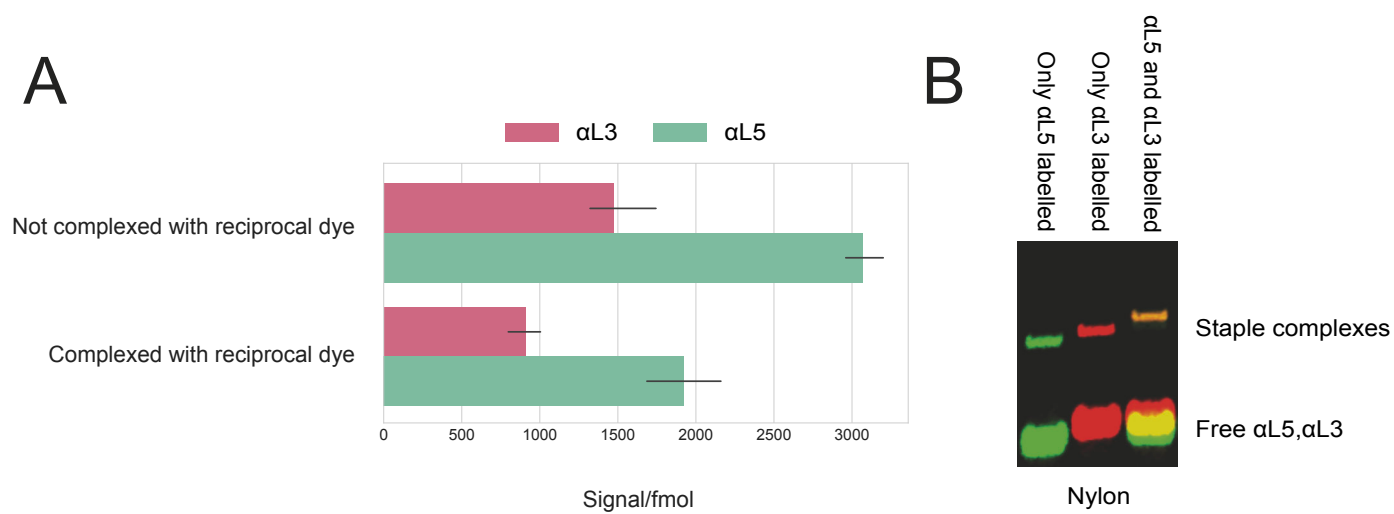

Fig S7

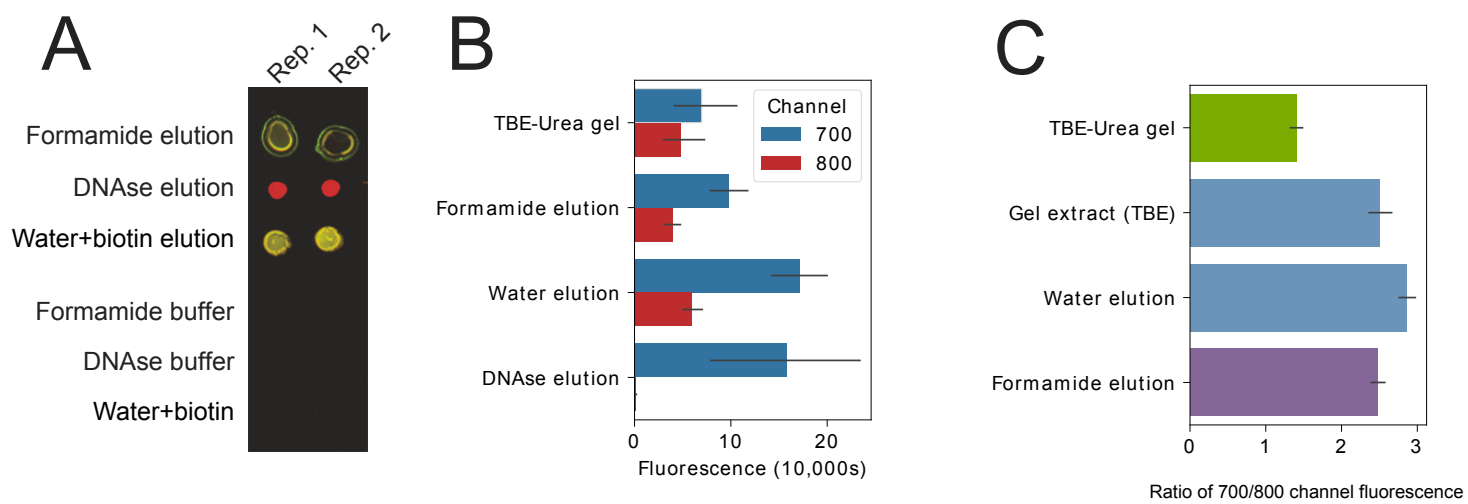

Fig S8

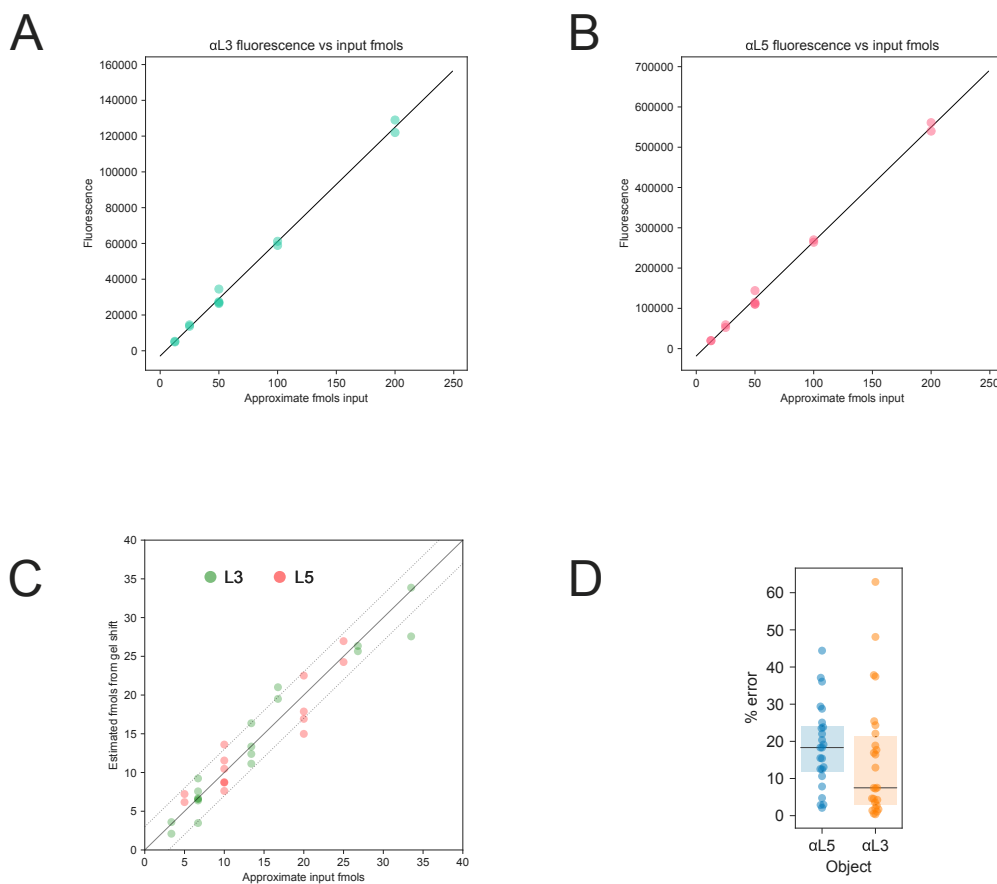

Fig S9

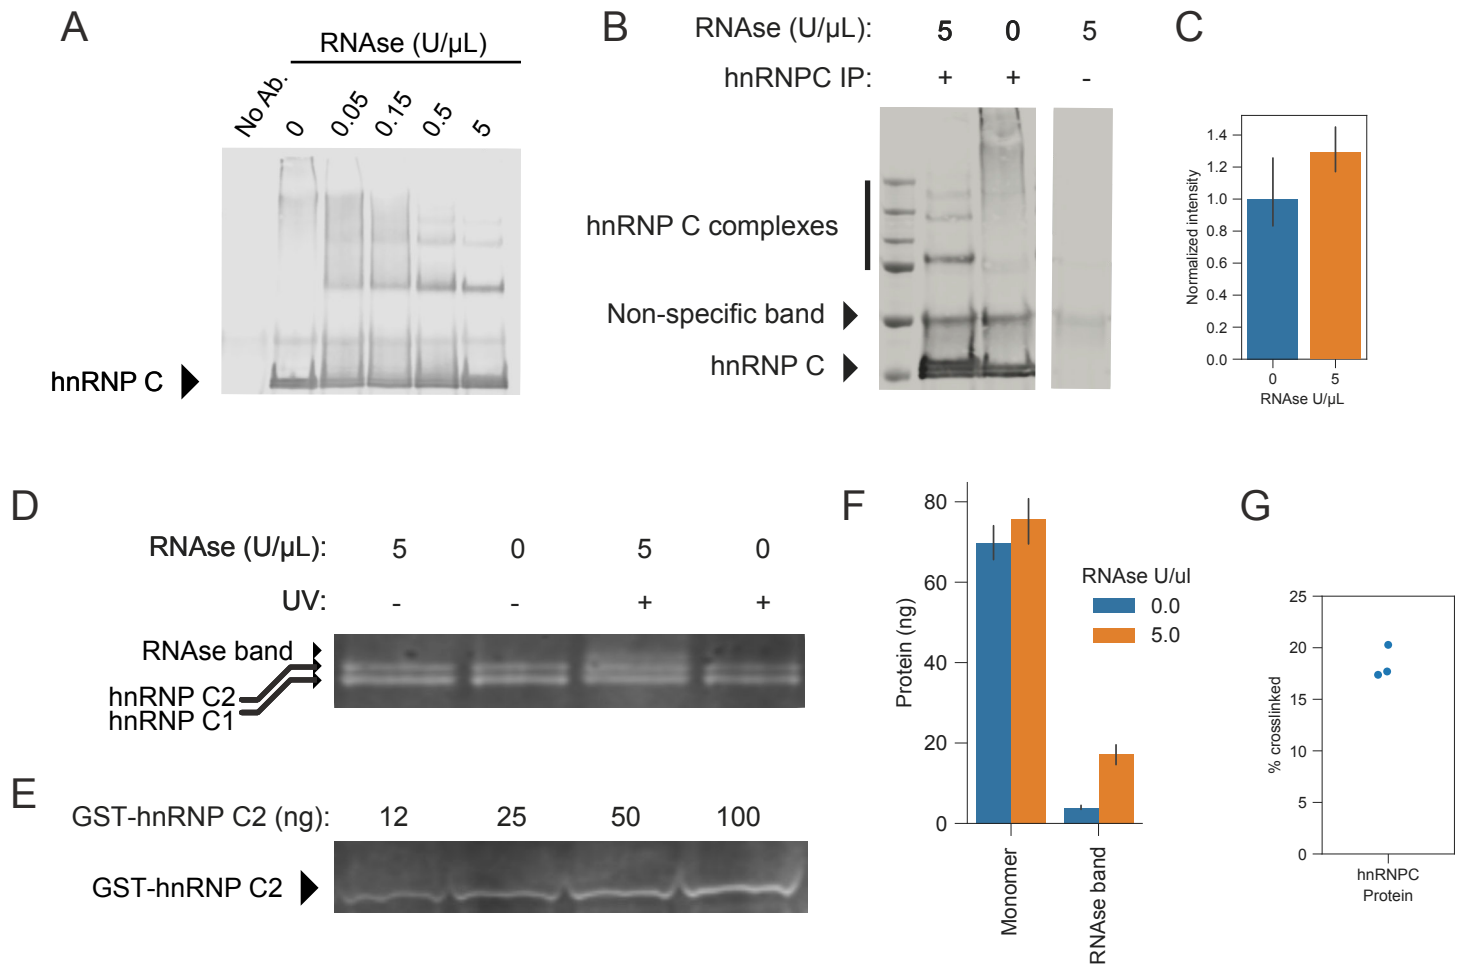

## non-RBPs usually purify little cross-linked RNA

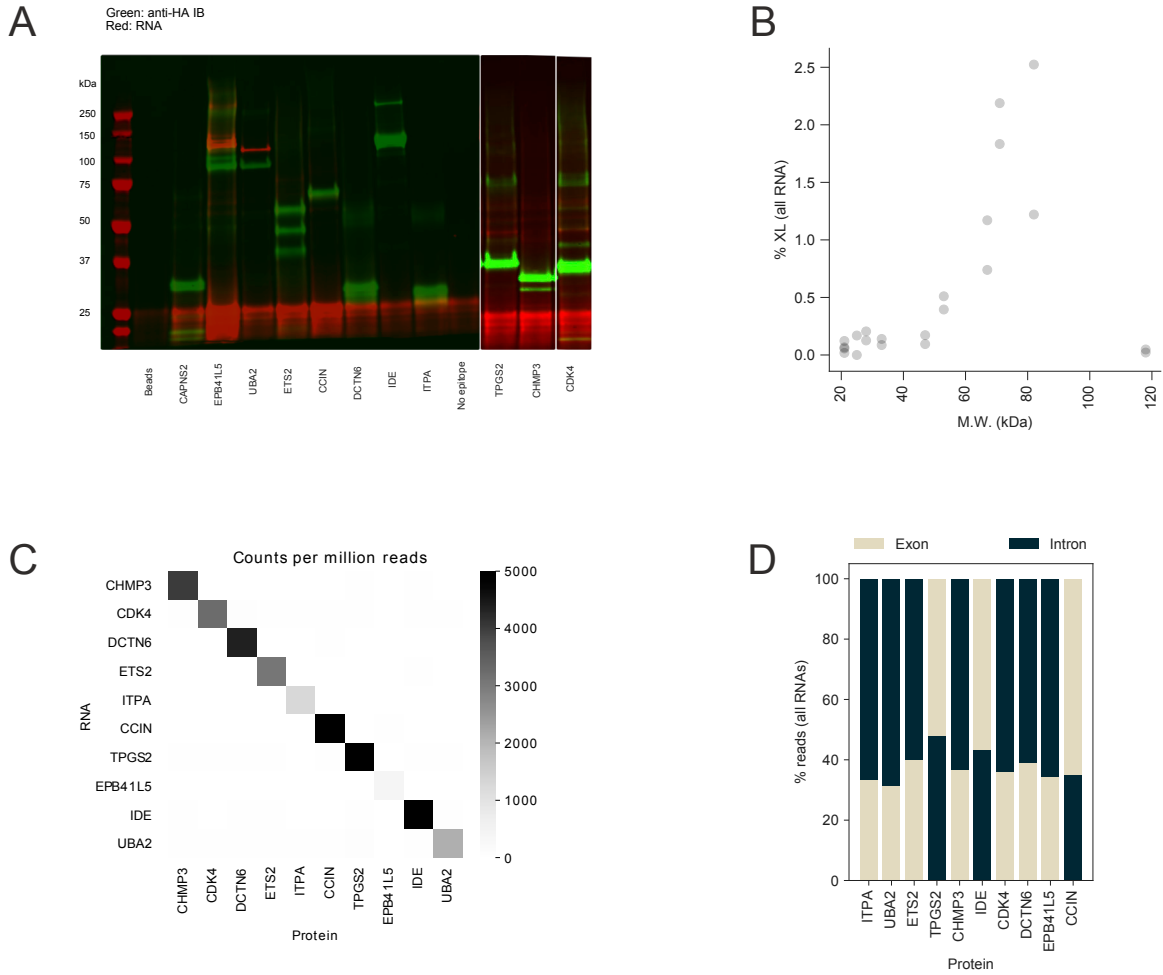

Fig S11

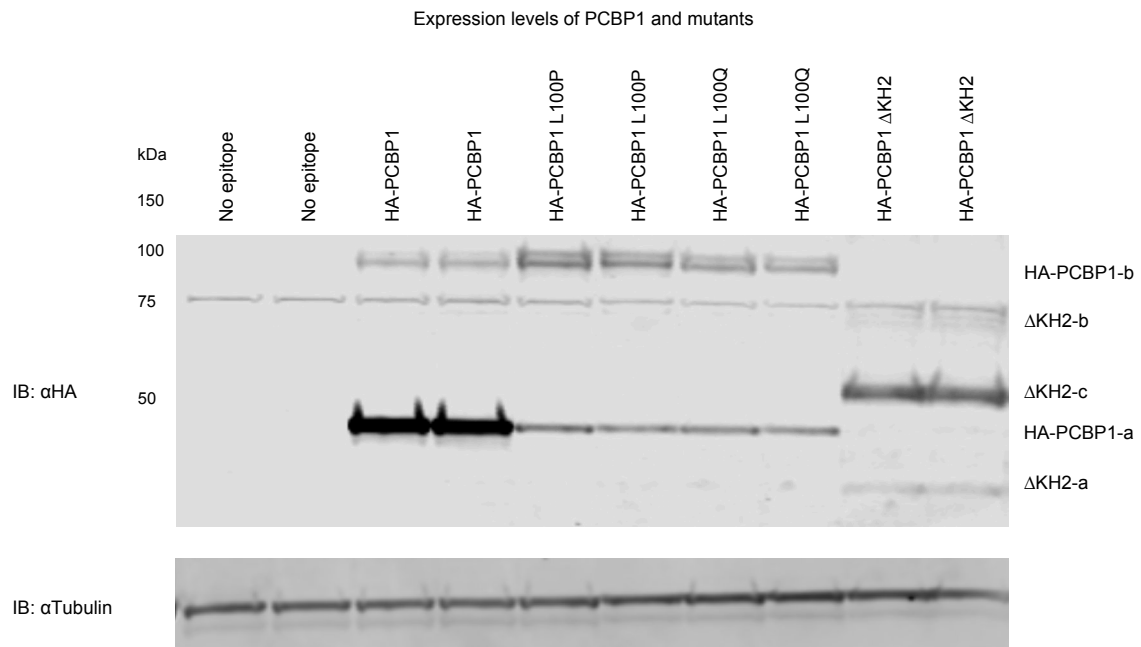

Fig S12

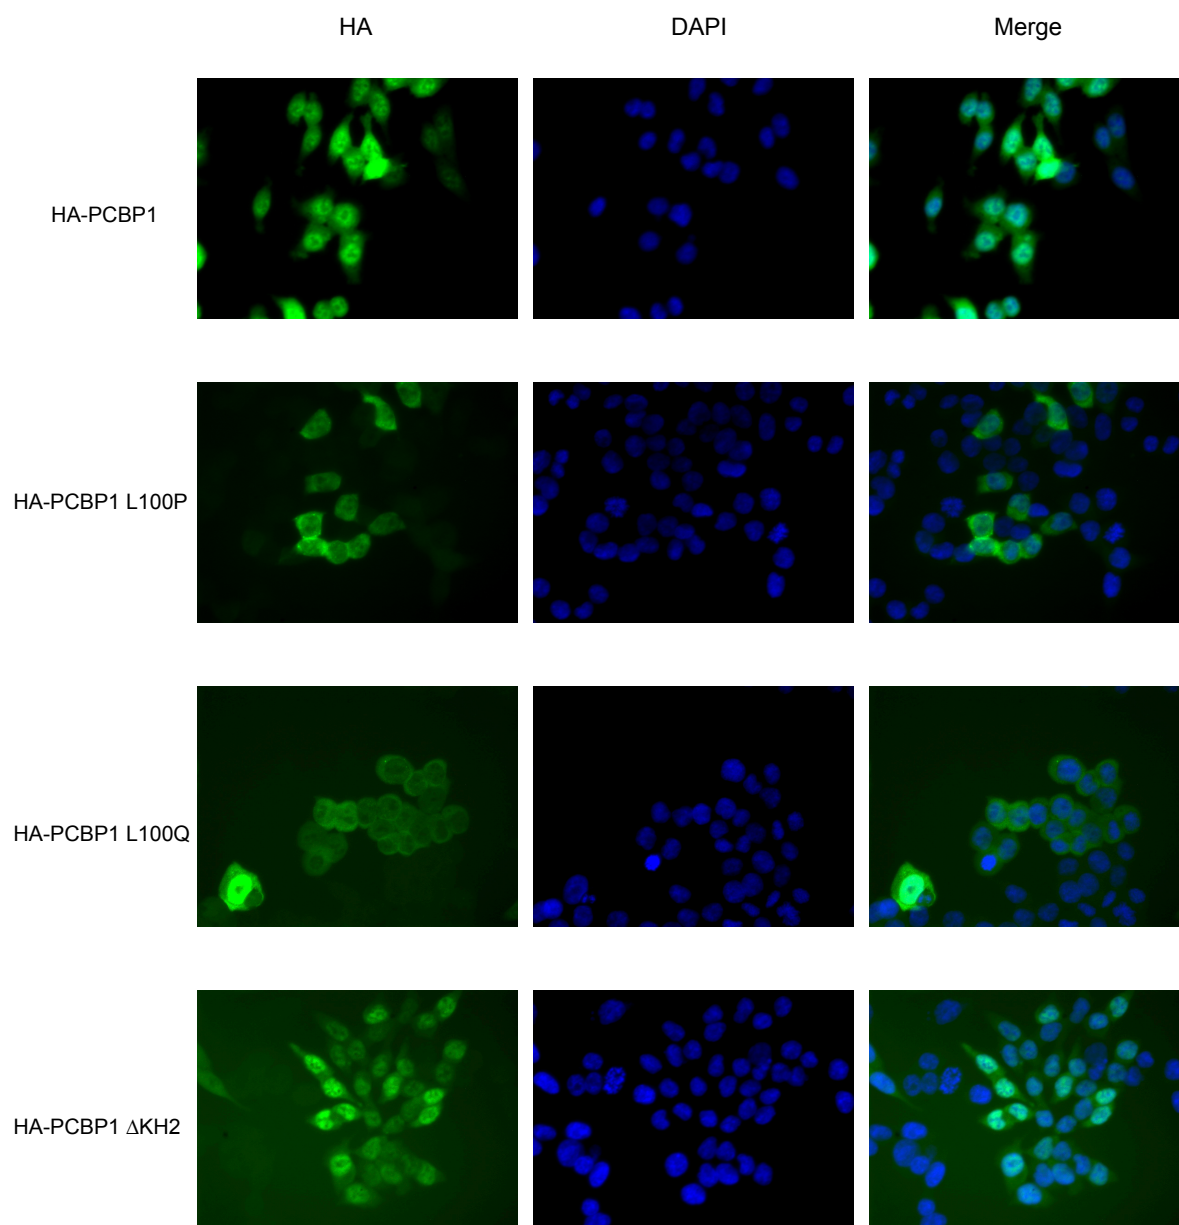

Source: http://biorxiv.org/content/10.1101/635888v1.full.pdf
